# Supplementary material for: Exploring the divalent effect in fucosidase inhibition with stereoisomeric pyrrolidine dimers
Source: Royal Society of Chemistry journal article supplement (doi:10.1039/c6ob00647g), 2016-01-01

## *Supporting Information*

# **Exploring the divalent effect in fucosidase inhibition with stereoisomeric pyrrolidine dimers**

**Audrey Hottin,<sup>[a]</sup> Daniel W. Wright,<sup>[b]</sup> Elena Moreno-Clavijo,<sup>[c]</sup> Antonio J. Moreno-Vargas,<sup>[c]</sup> Gideon J. Davies<sup>[b]</sup> and Jean-Bernard Behr<sup>\*[a]</sup>**

### **Supporting Information**

- 1) Chemistry
  - a) General considerations p. **S2**
  - b) <sup>1</sup>H and <sup>13</sup>C- NMR spectra of new compounds p. **S3**
- 2) Crystal Structure determination (Macromolecular X-ray data collection and refinement statistics) p. **S22**
- 3) fucosidase inhibition assays (plots) p. **S23**

**E-mail: [jb.behr@univ-reims.fr](mailto:jb.behr@univ-reims.fr)**

## Chemistry :

*General considerations:* All reagents and solvents were commercially available in high purity and used as received. Silica gel F<sub>254</sub> (0.2 mm) was used for TLC plates, detection being carried out by spraying with an alcoholic solution of phosphomolybdic acid, *p*-anisaldehyde or an aqueous solution of KMnO<sub>4</sub> (2%) / Na<sub>2</sub>CO<sub>3</sub> (4%), followed by heating. Flash column chromatography was performed over silica gel M 9385 (40-63 μm) Kieselgel 60. NMR spectra were recorded on Bruker AC 250 (250 MHz for <sup>1</sup>H, 62.5 MHz for <sup>13</sup>C) or 600 (600 MHz for <sup>1</sup>H, 150 MHz for <sup>13</sup>C) spectrometers. Chemical shifts are expressed in parts per million (ppm) and were calibrated to the residual solvent peak. Coupling constants are in Hz and splitting pattern abbreviations are: br, broad; s, singlet; d, doublet; t, triplet; q, quartet; qt, quintuplet; m, multiplet. IR spectra were recorded with an IR<sup>TM</sup> plus MIDAC spectrophotometer and are expressed in cm<sup>-1</sup>. Optical rotations were determined at 20 °C with a Perkin-Elmer Model 241 polarimeter in the specified solvents. High Resolution Mass Spectra (HRMS) were performed on Q-TOF Micro micromass positive ESI (CV = 30 V).

**<sup>1</sup>H-NMR spectrum of compound 7 (CDCl<sub>3</sub>, 600 MHz)**

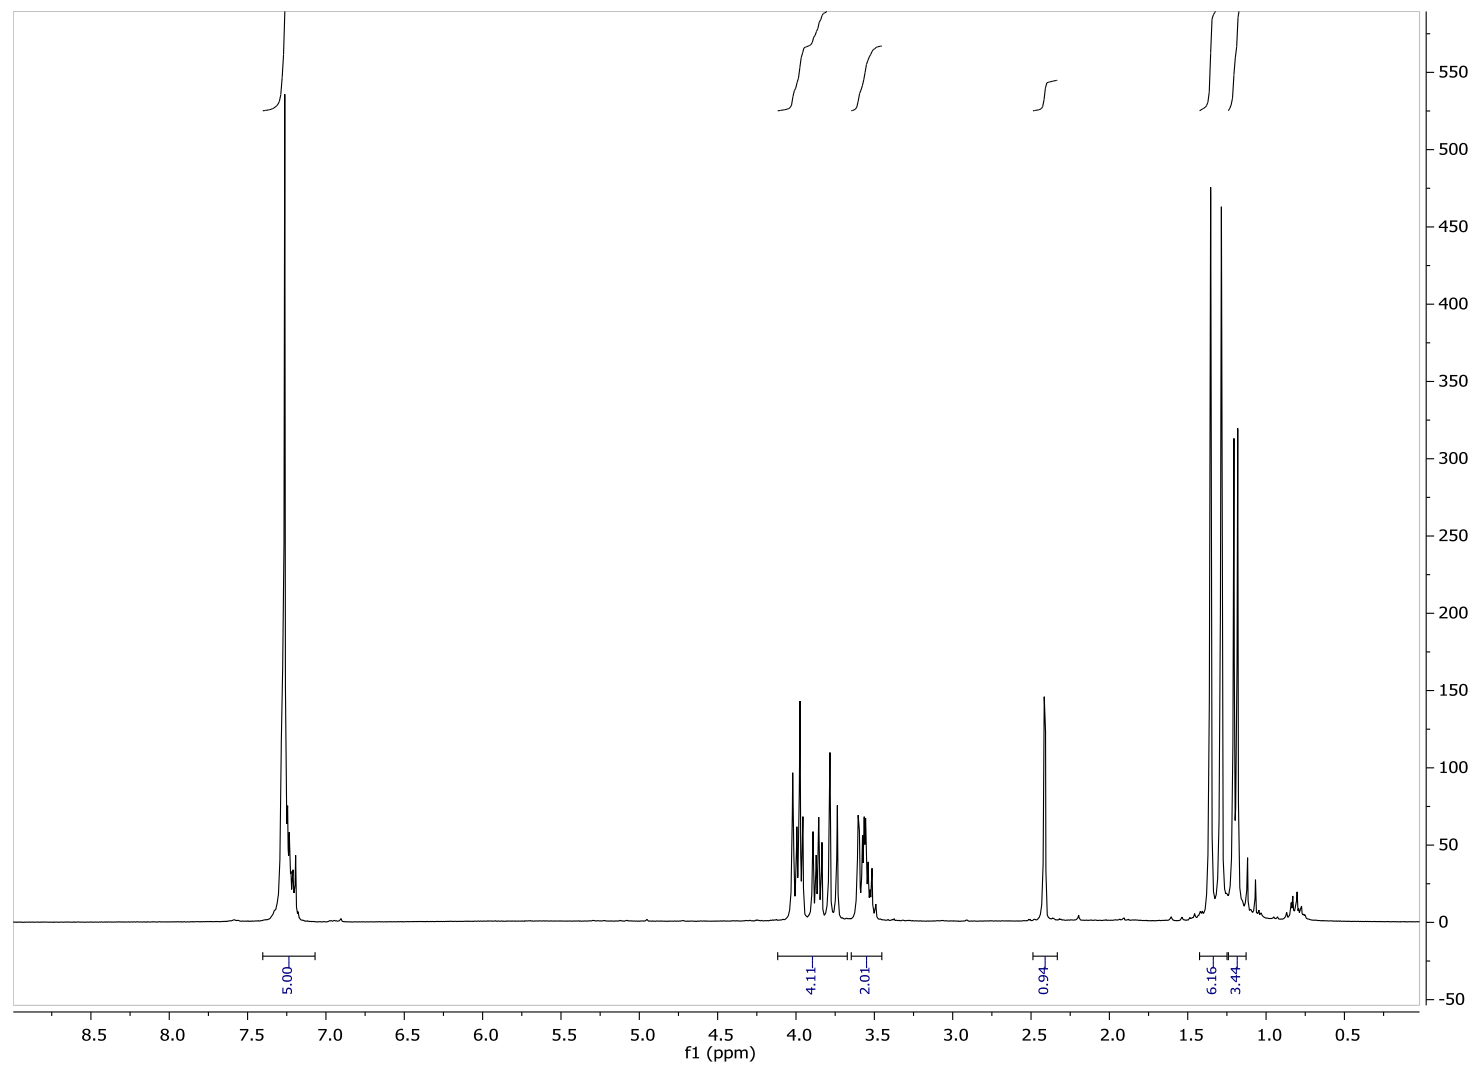

<sup>13</sup>C-NMR spectrum of compound 7 (CDCl<sub>3</sub>, 151 MHz)

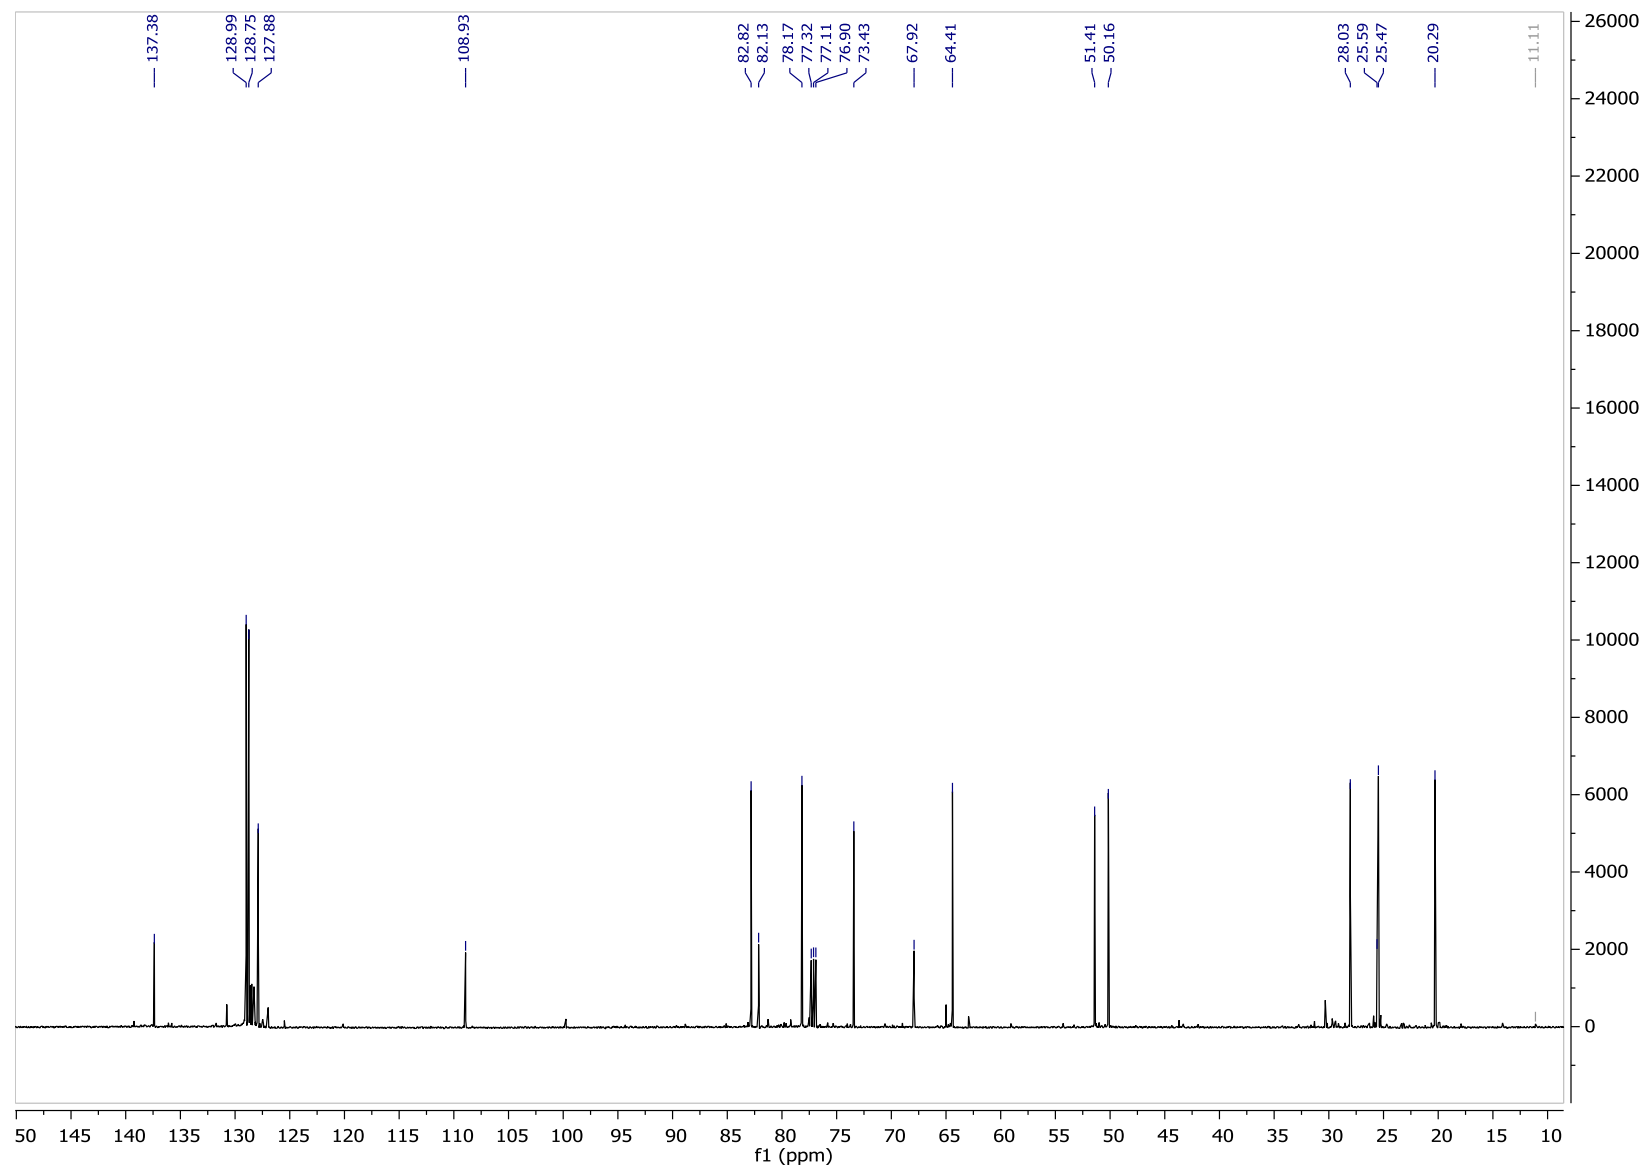

**<sup>1</sup>H-NMR spectrum of compound 8 (CDCl<sub>3</sub>, 500 MHz)**

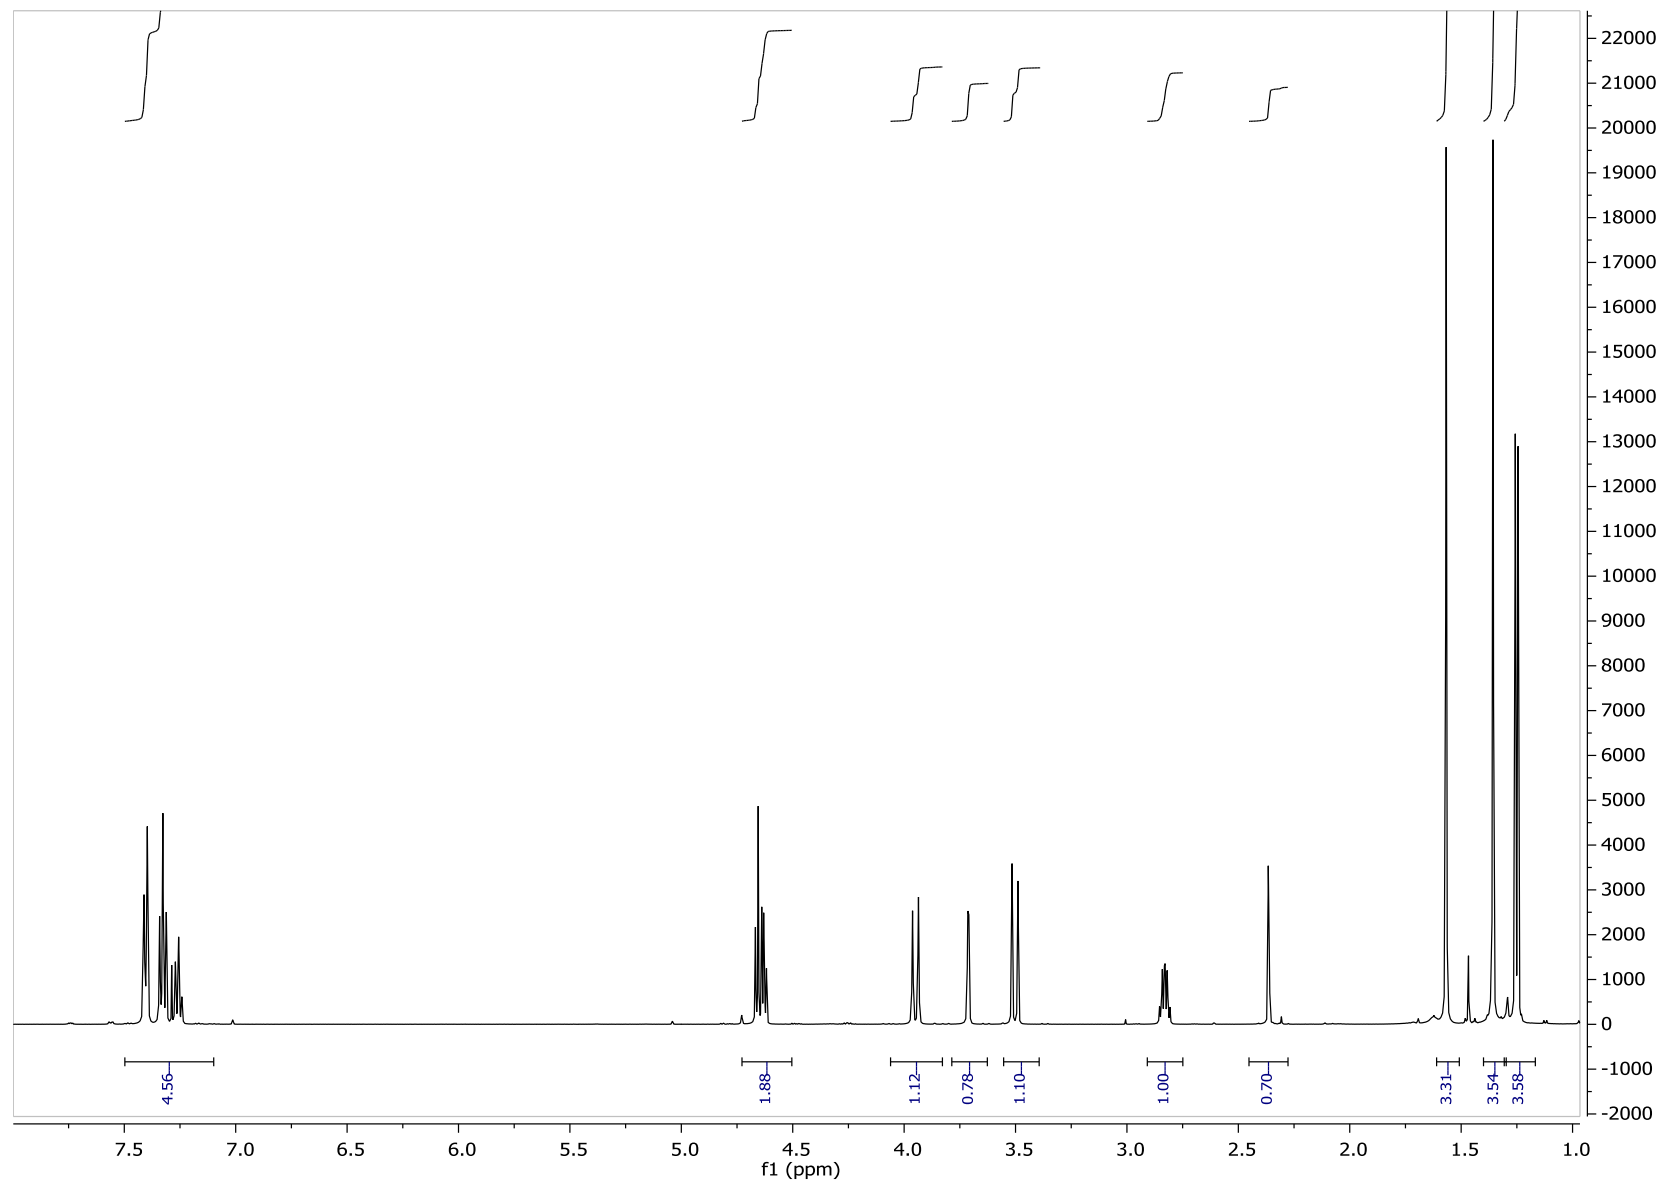

<sup>13</sup>C-NMR spectrum of compound 8 (CDCl<sub>3</sub>, 126 MHz)

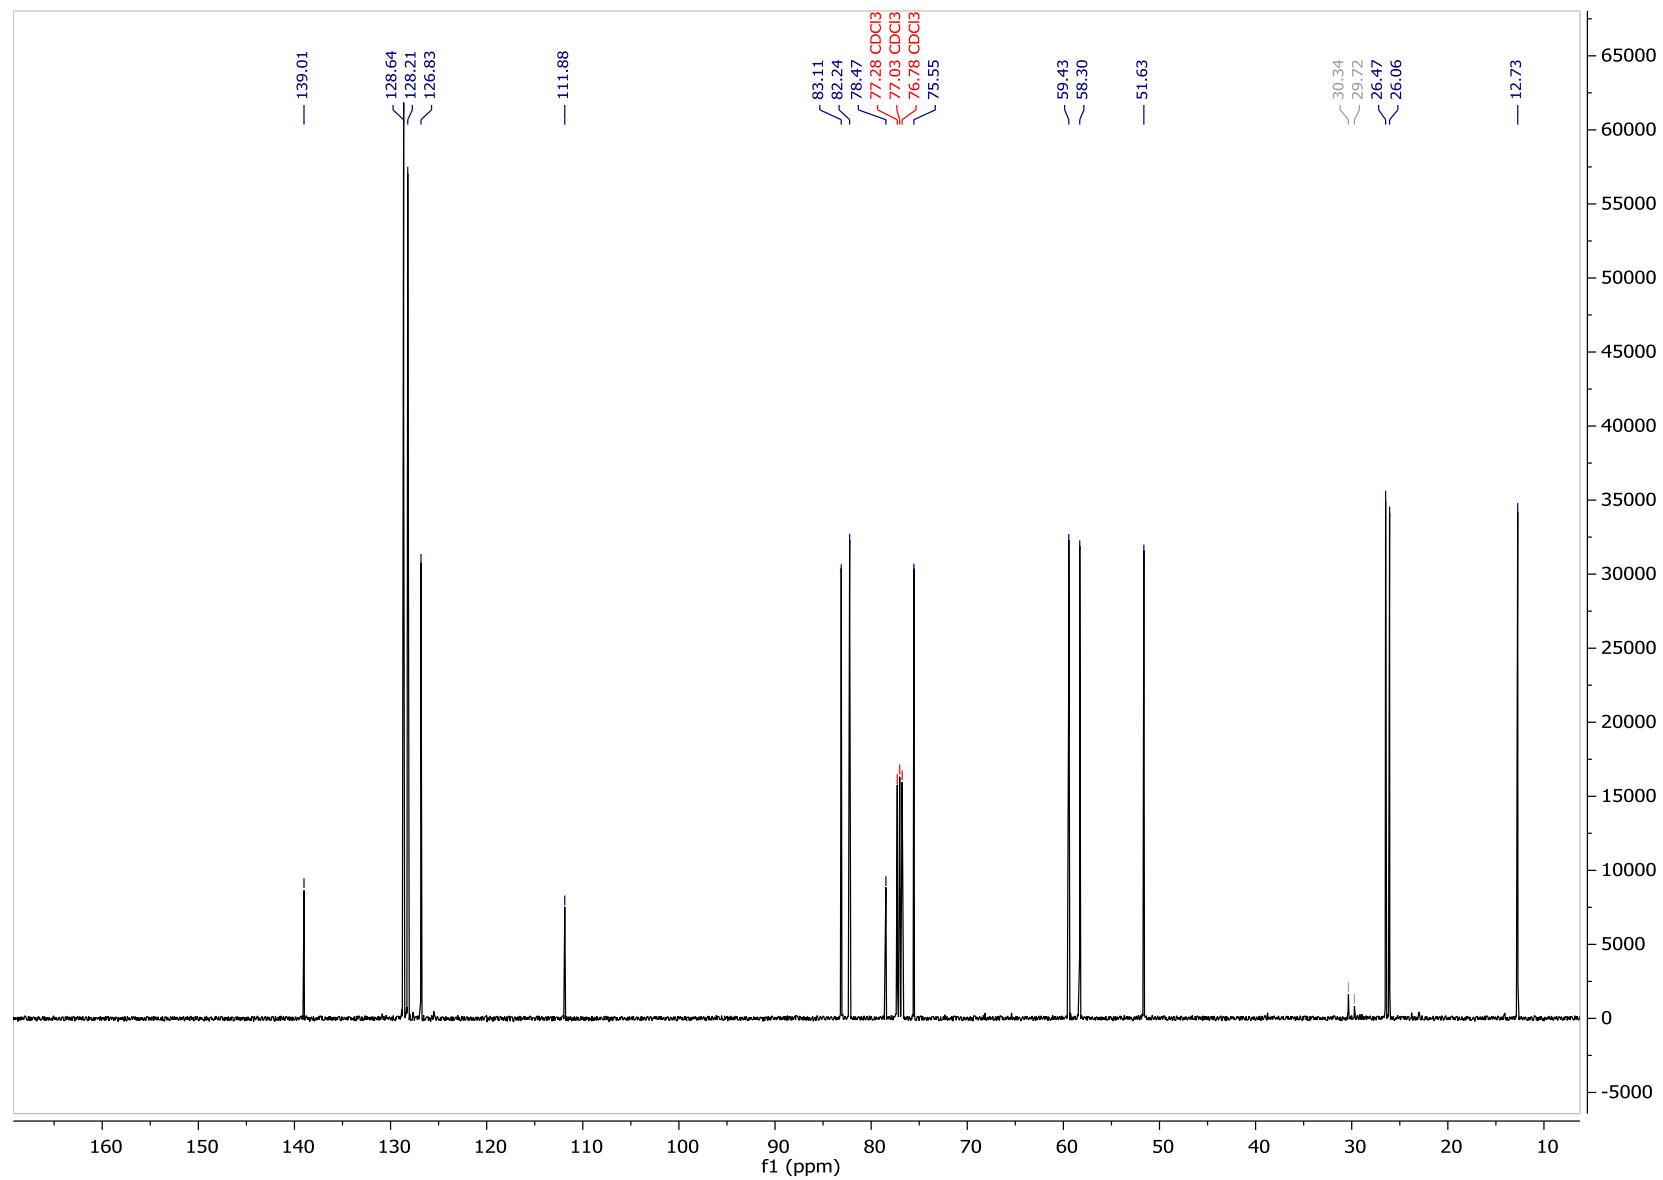

**<sup>1</sup>H-NMR spectrum of compound 9 (CDCl<sub>3</sub>, 250 MHz)**

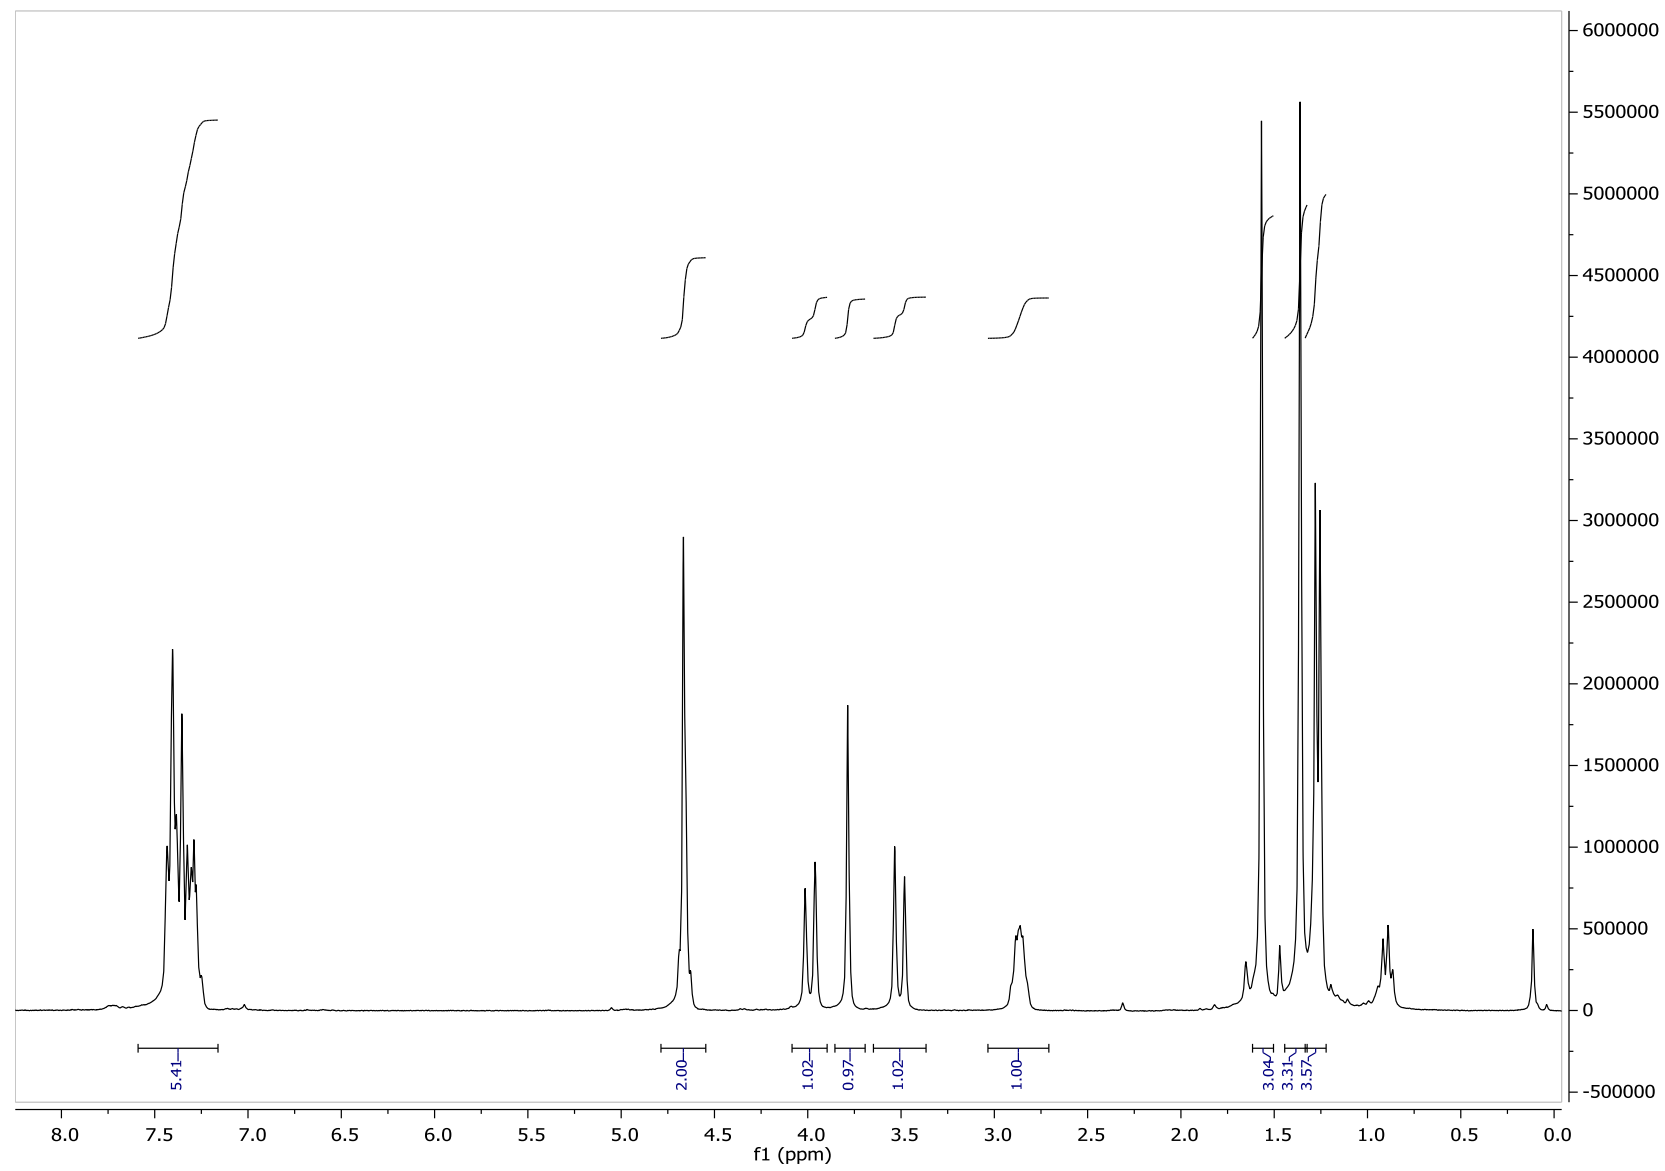

<sup>13</sup>C-NMR spectrum of compound 9 (CDCl<sub>3</sub>, 63 MHz)

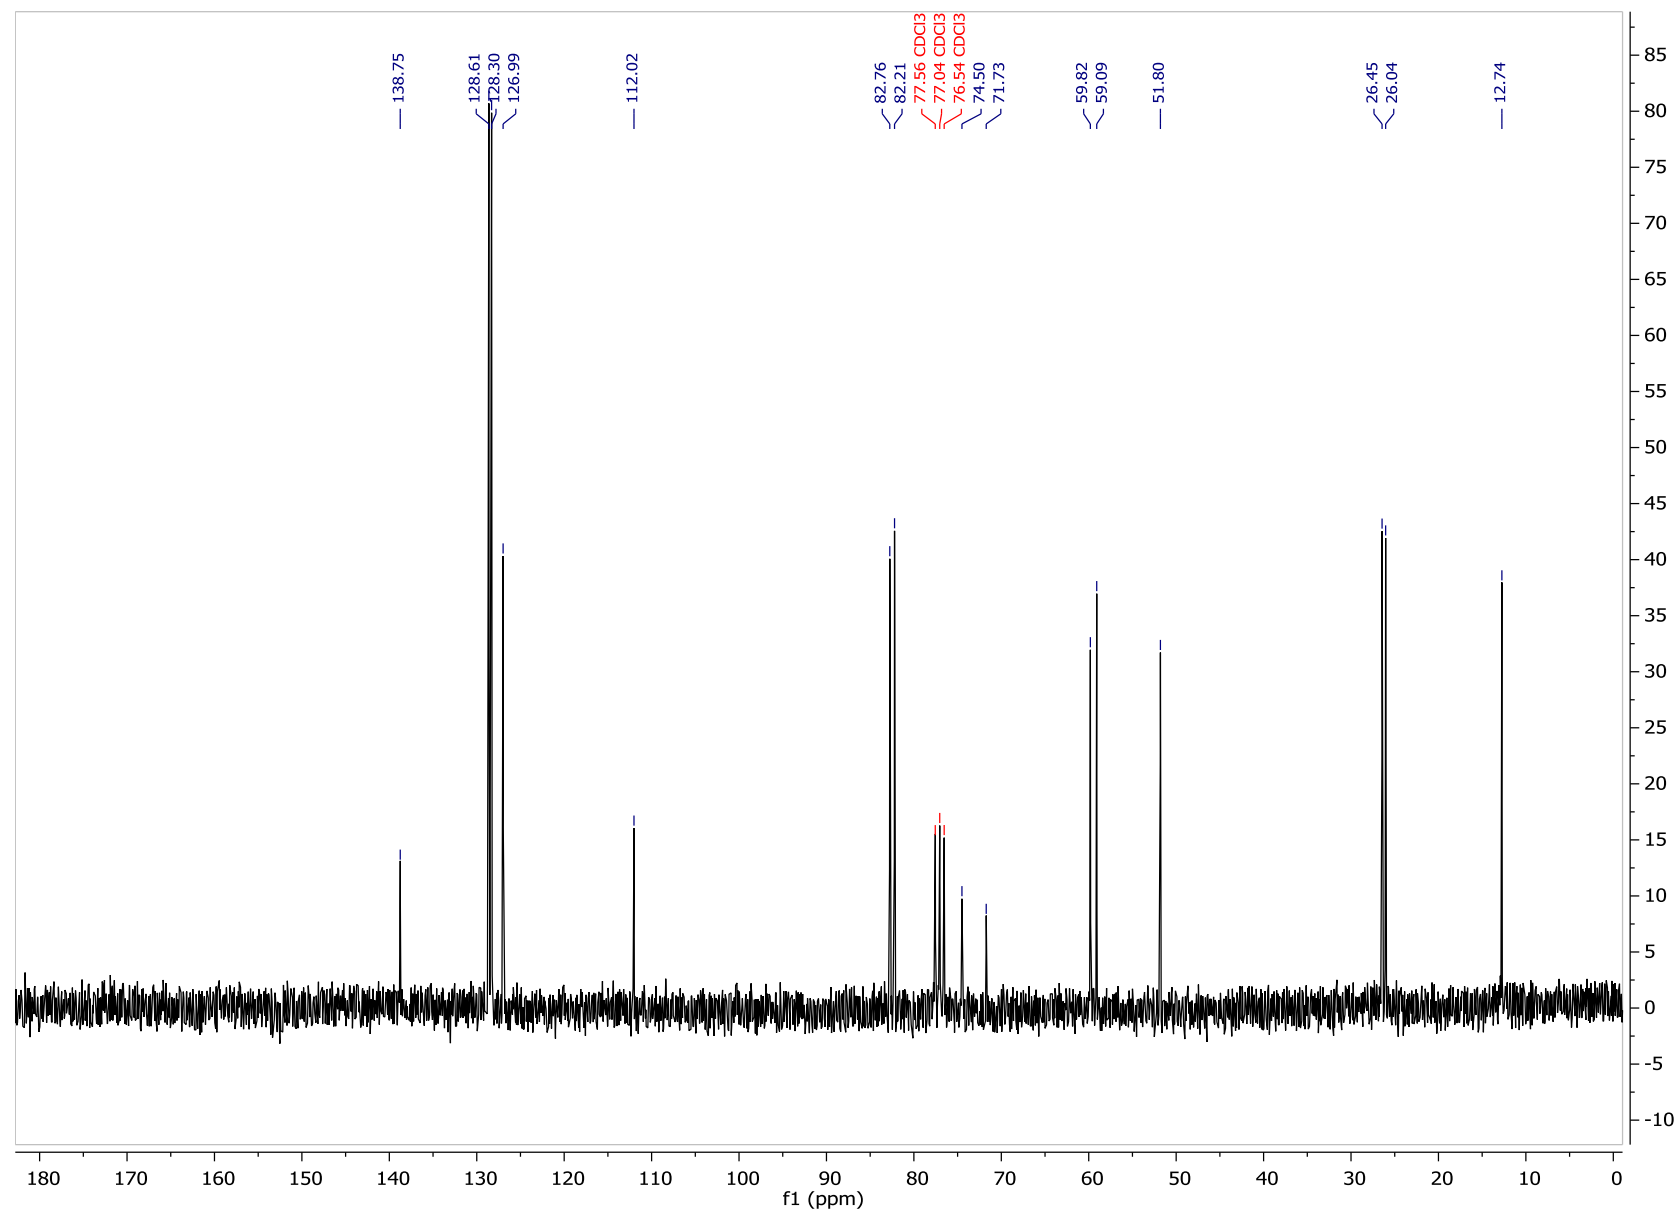



<sup>1</sup>H-NMR spectrum of compound 1 (CD<sub>3</sub>OD, 500 MHz)

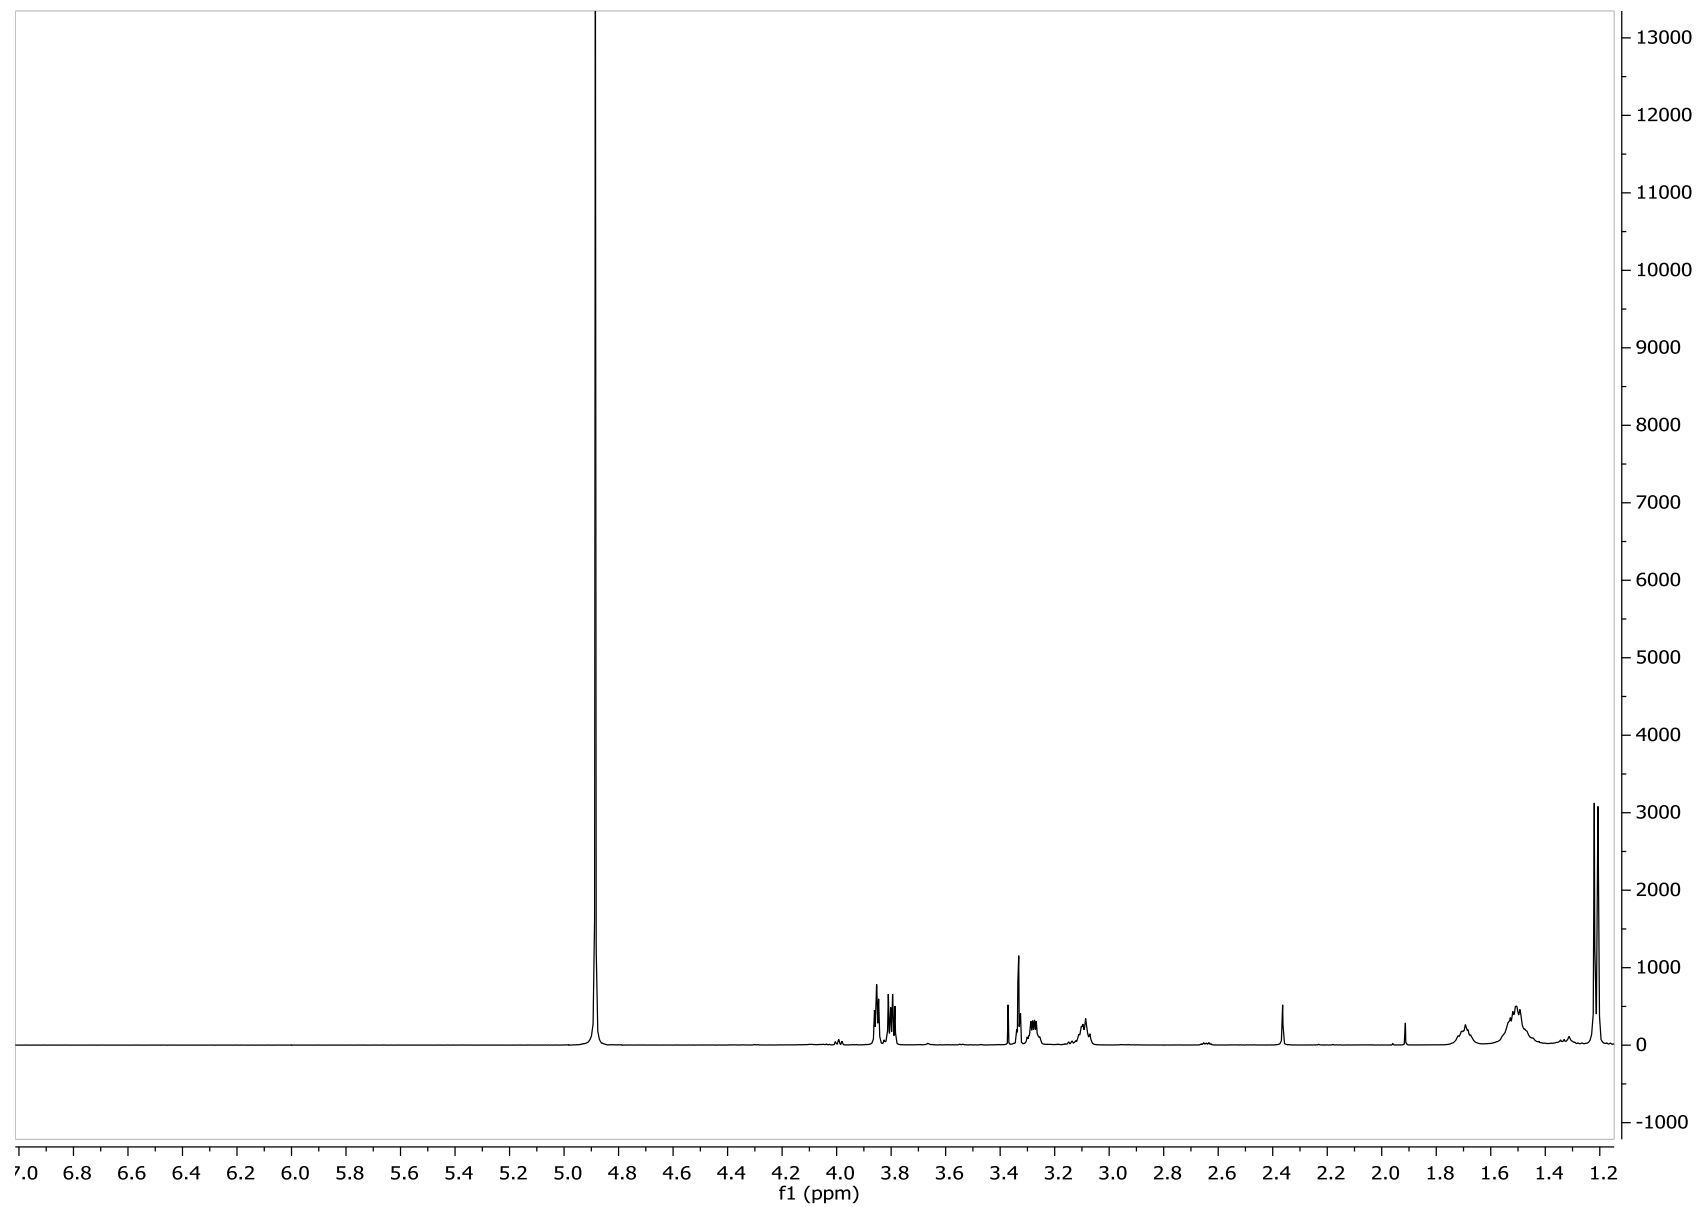

**$^{13}\text{C}$ -NMR (DEPT) spectrum of compound 1 ( $\text{CD}_3\text{OD}$ , 126 MHz)**

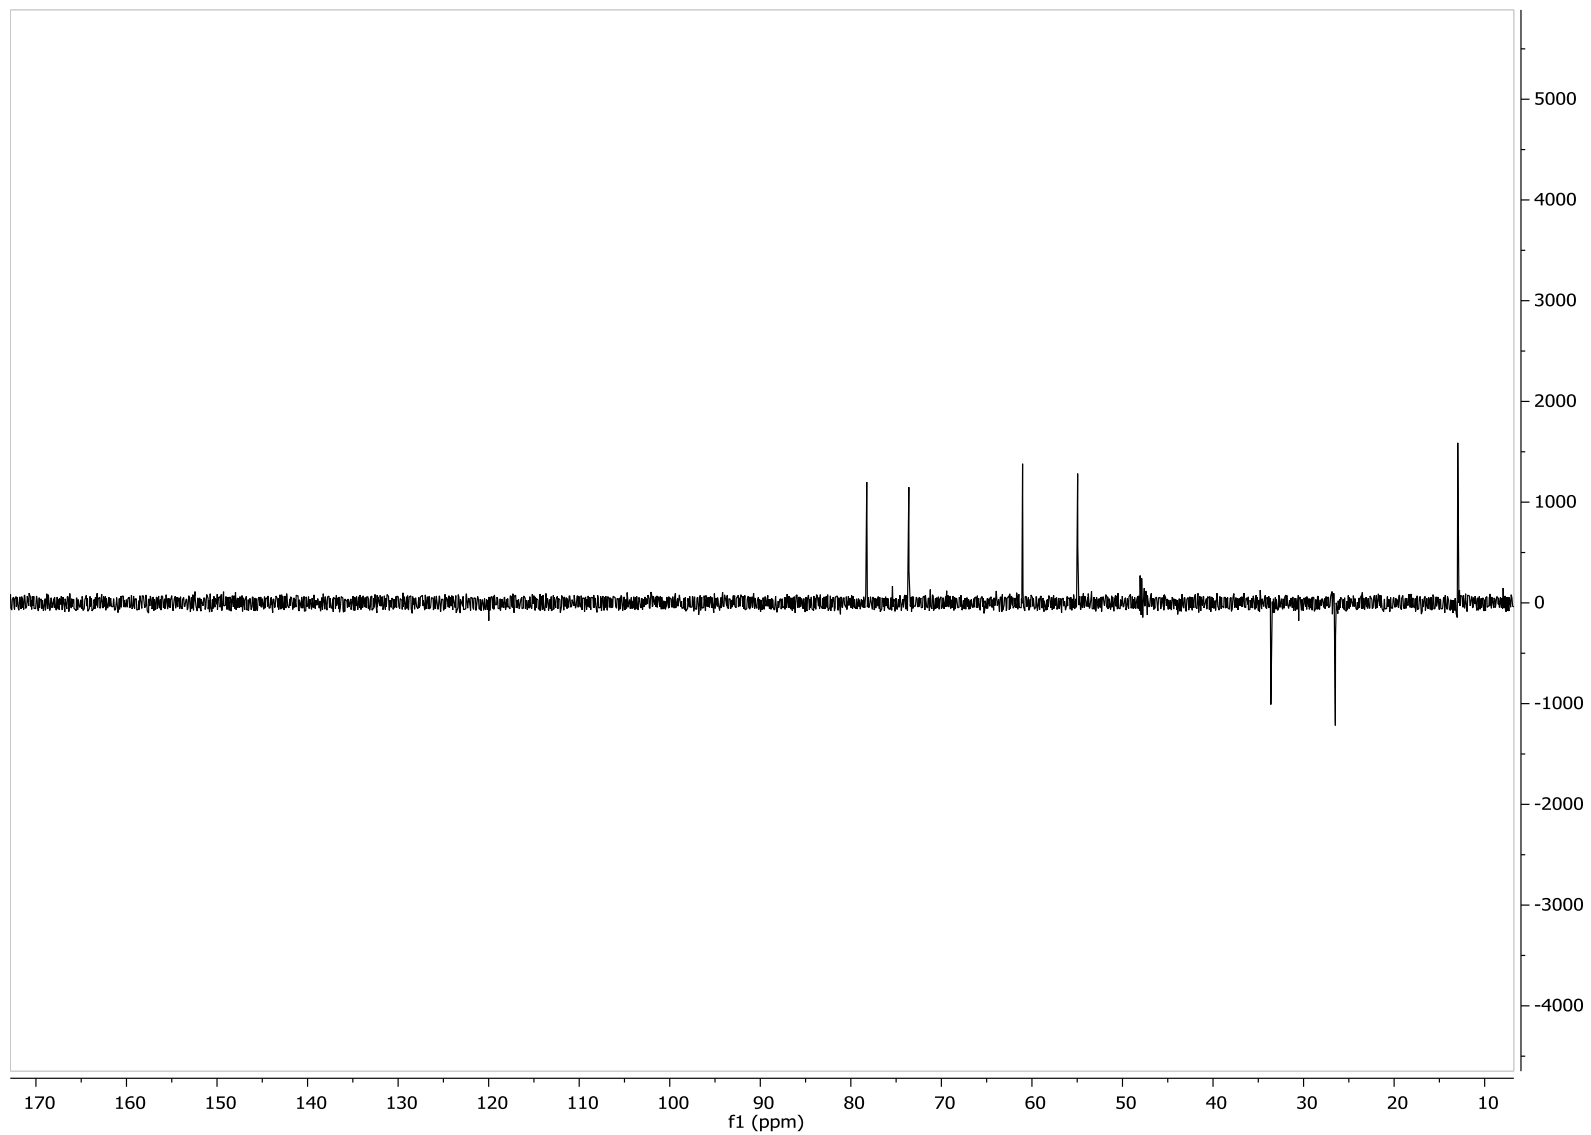

**$^1\text{H}$ -NMR spectrum of compound 3 ( $\text{D}_2\text{O}$ , 500 MHz)**

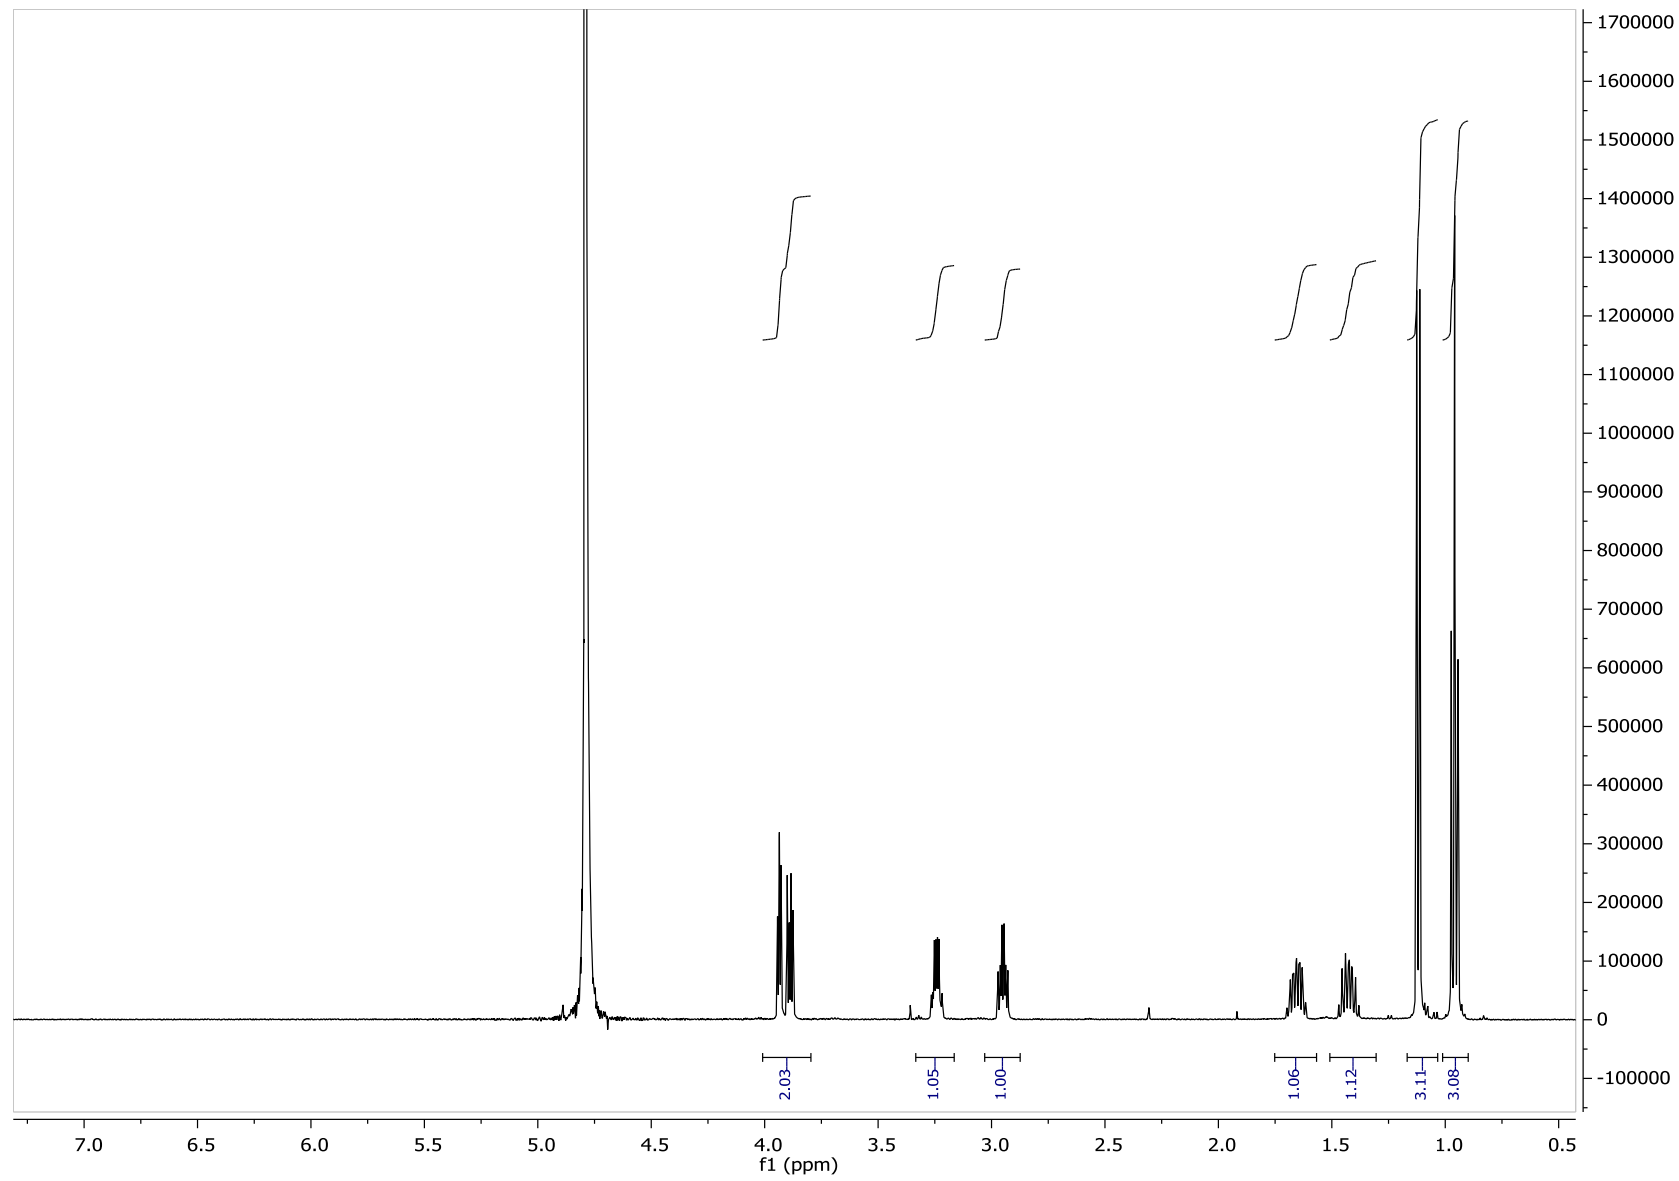

<sup>13</sup>C-NMR spectrum of compound 3 (D<sub>2</sub>O, 126 MHz)

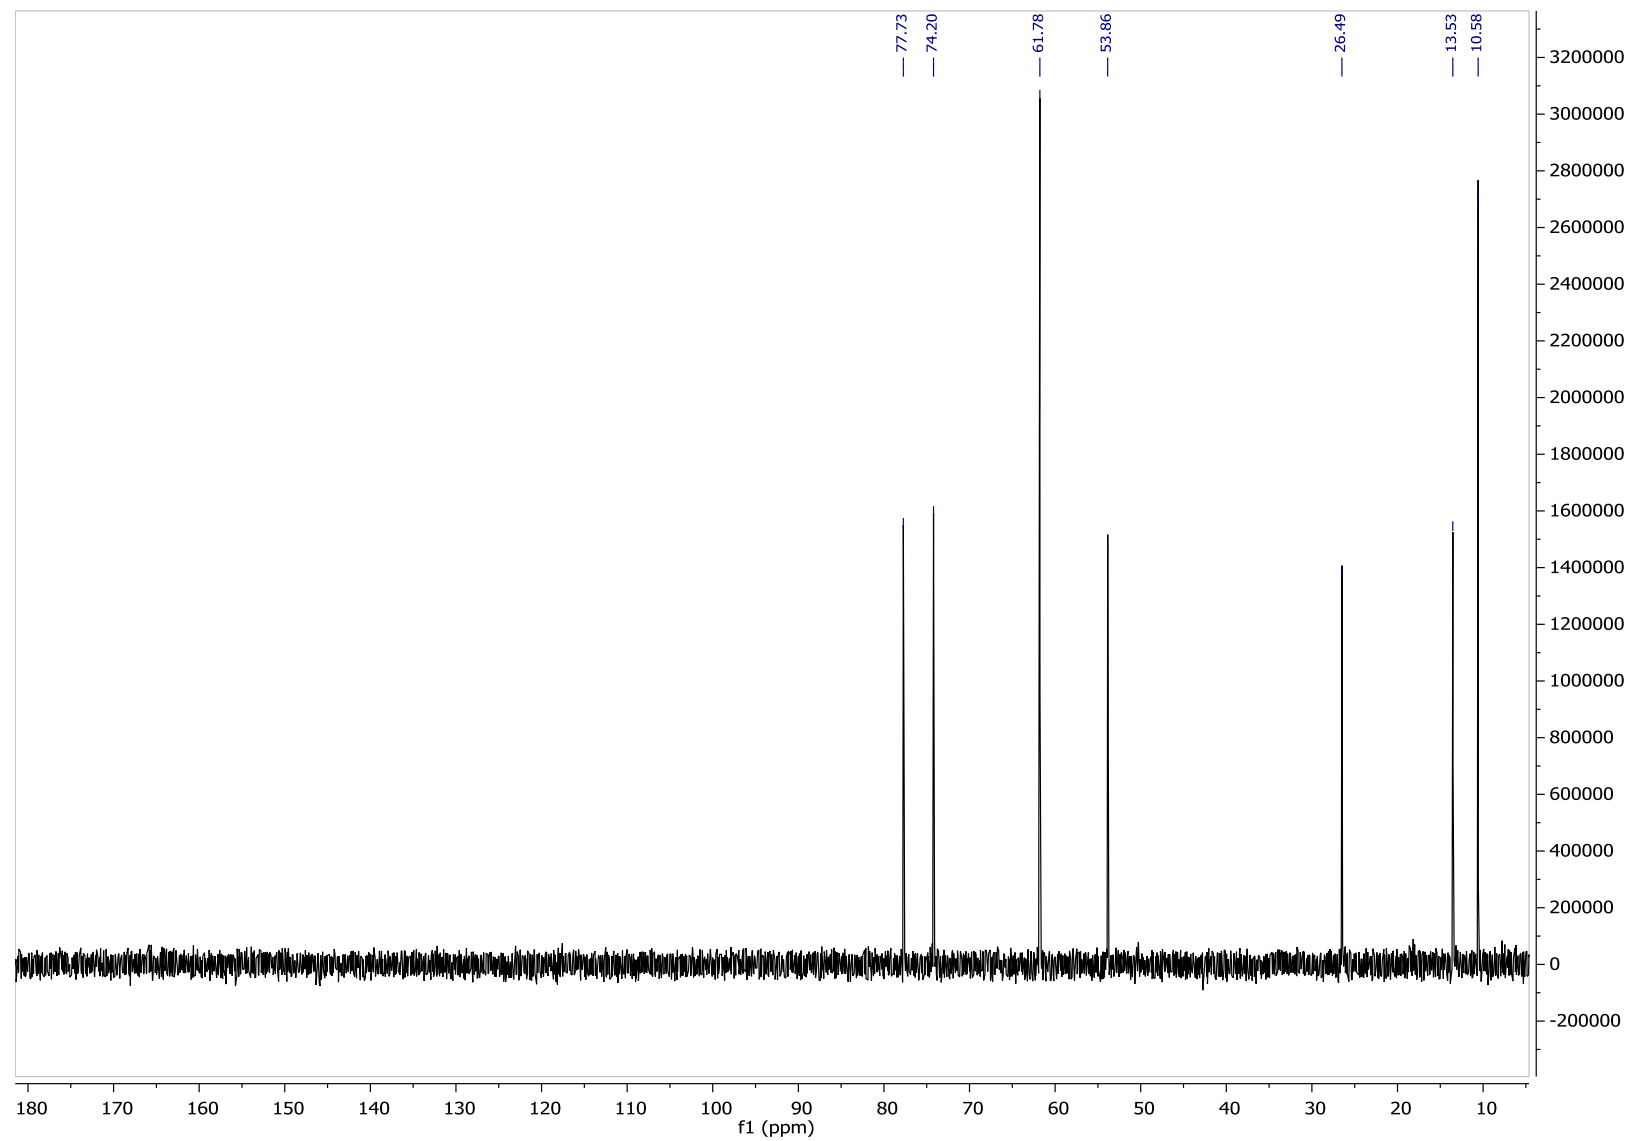

**<sup>1</sup>H-NMR spectrum of compound 12 (CDCl<sub>3</sub>, 500 MHz)**

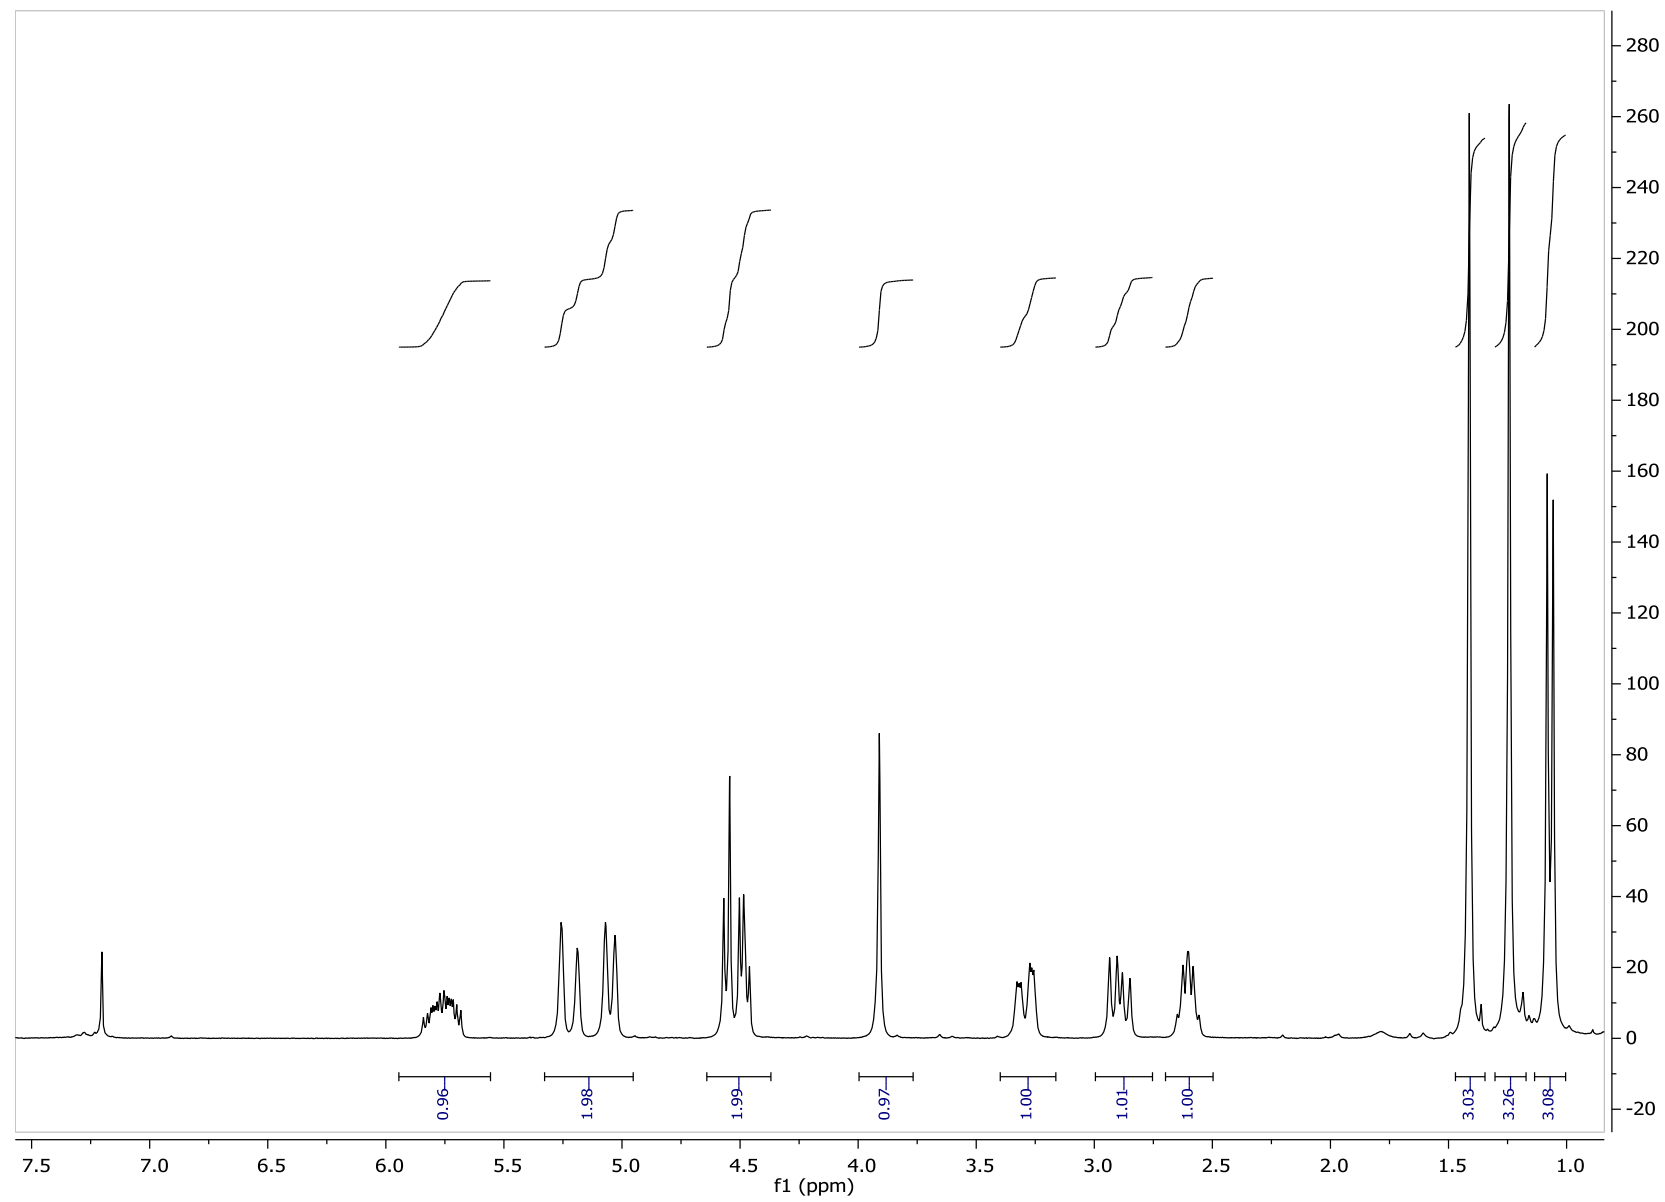

**<sup>1</sup>H-NMR spectrum of compound 13 (CDCl<sub>3</sub>, 250 MHz)**

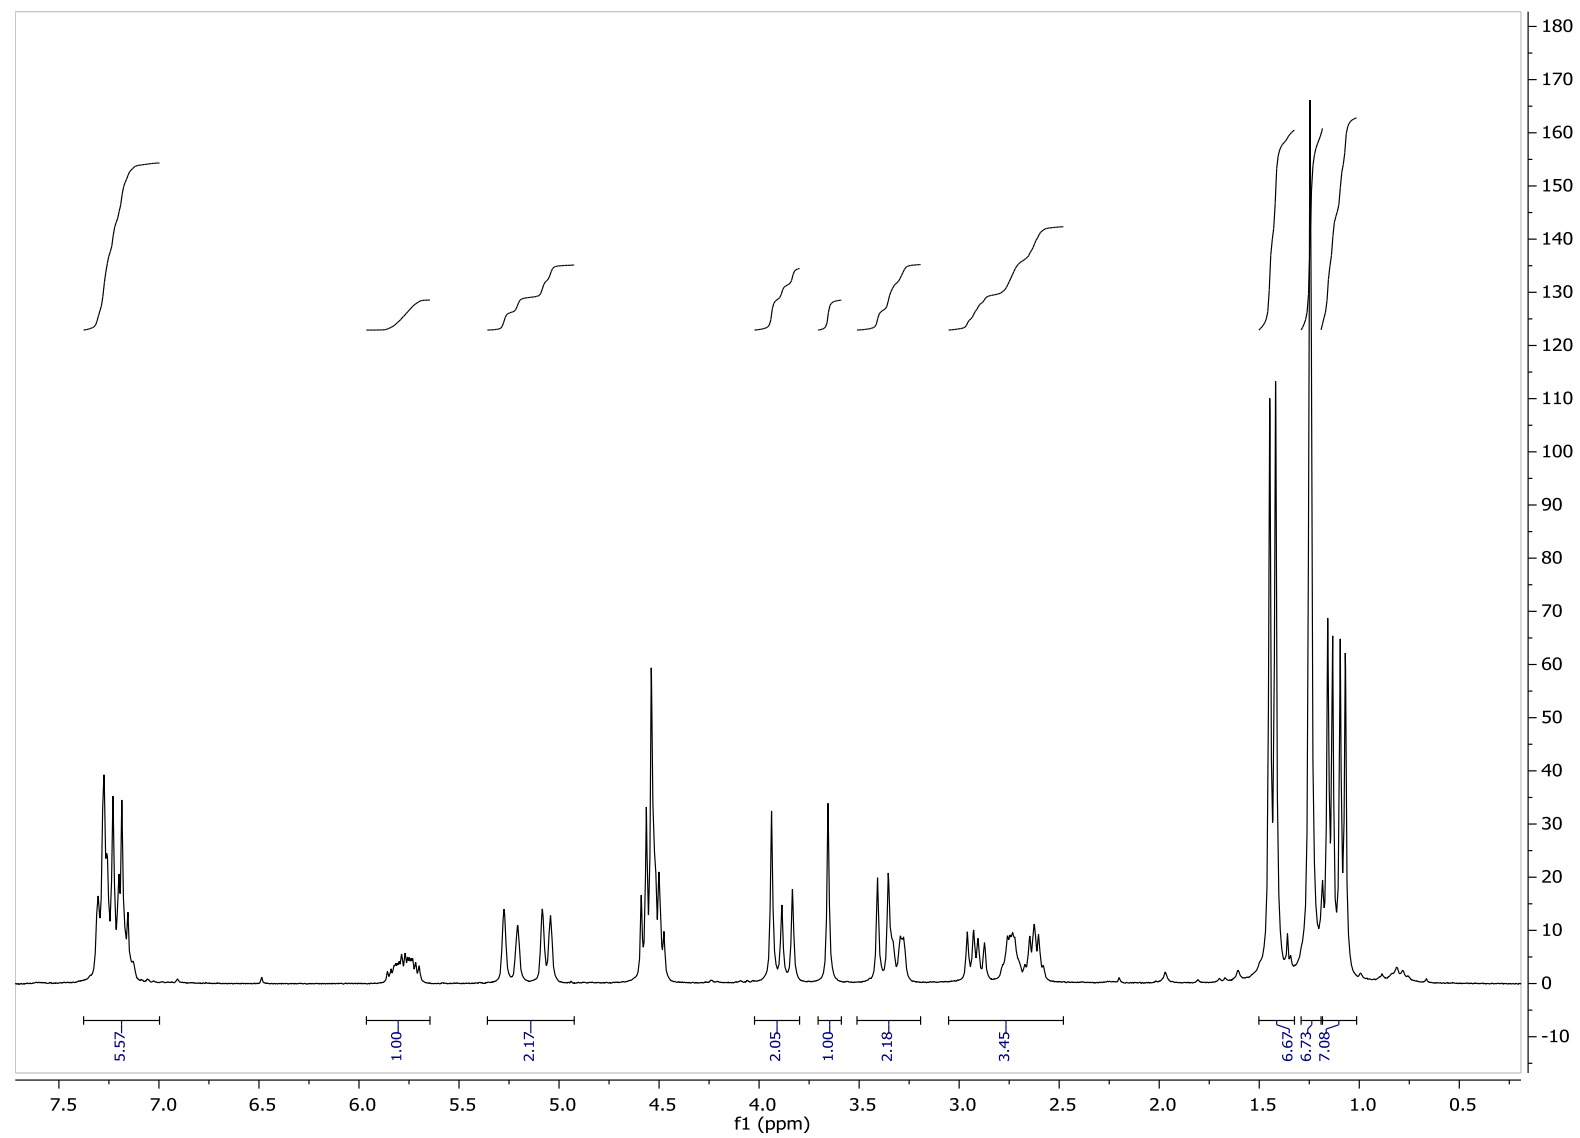

<sup>13</sup>C-NMR (JMOD) spectrum of compound 13 (CDCl<sub>3</sub>, 63 MHz)

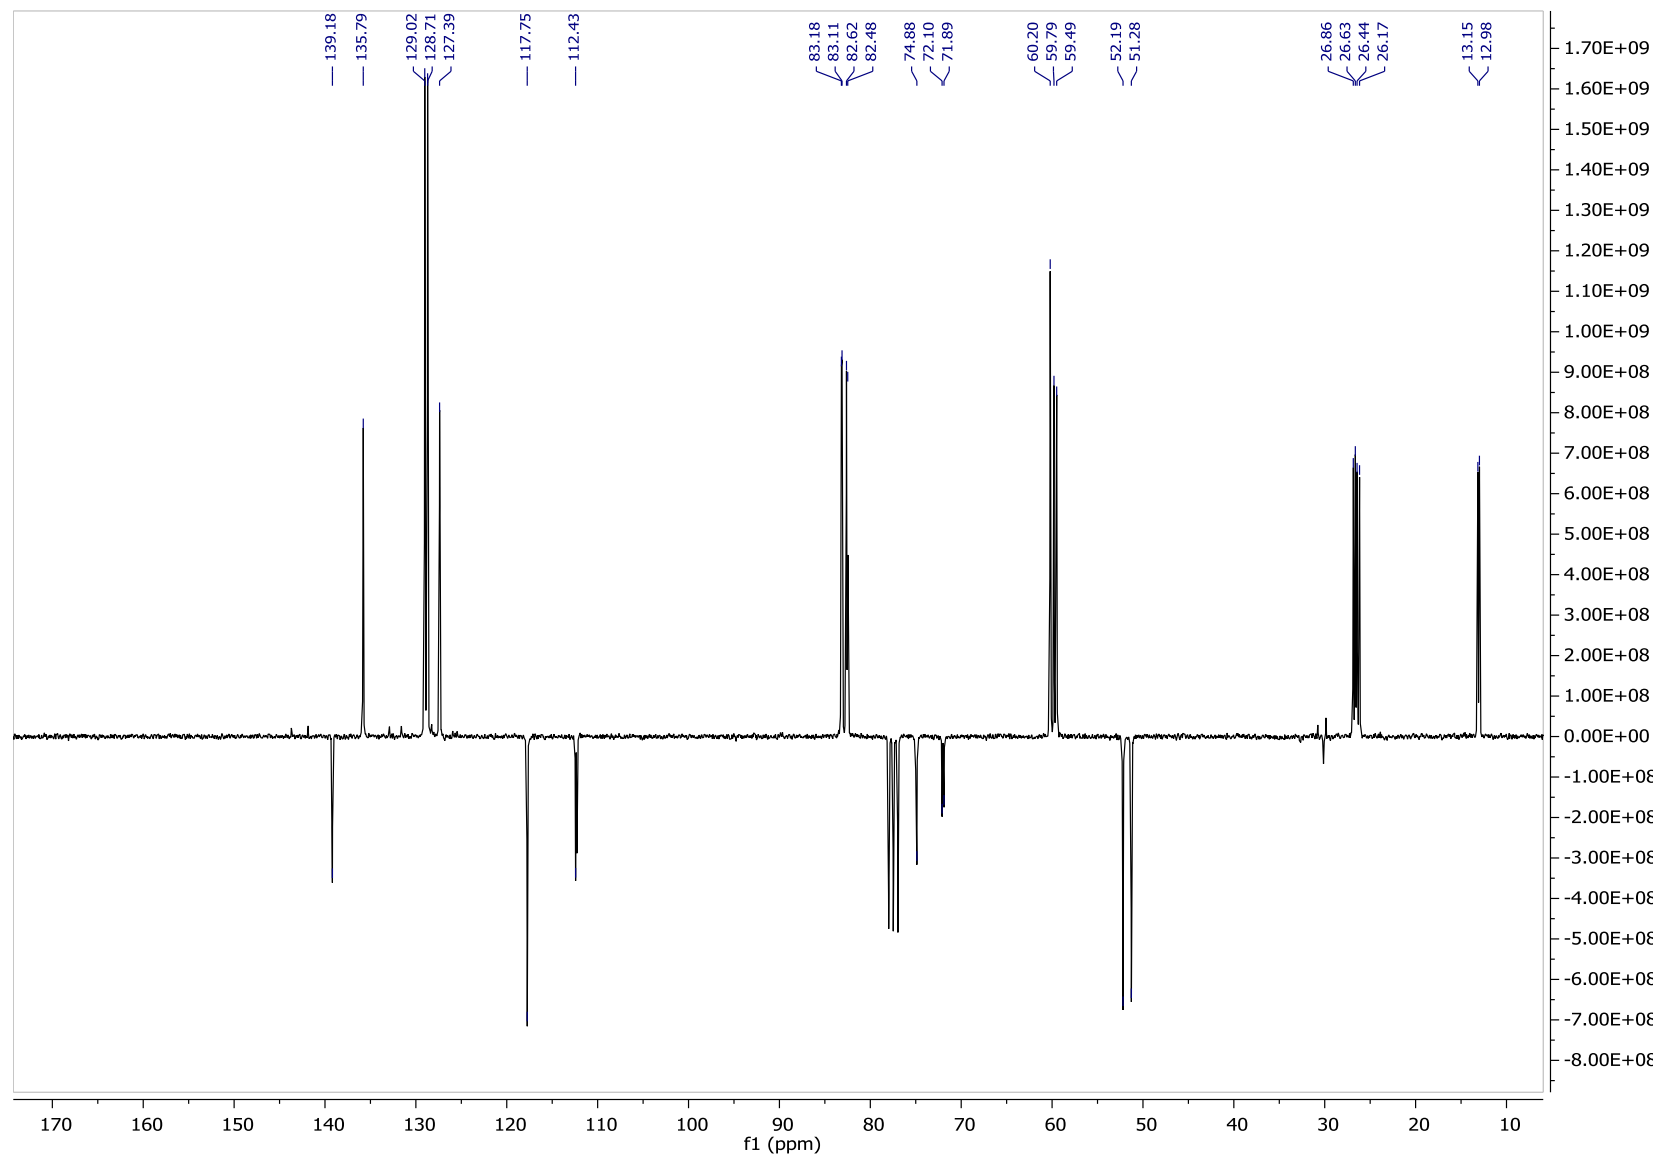

**<sup>1</sup>H-NMR spectrum of compound 14 (CDCl<sub>3</sub>, 250 MHz)**

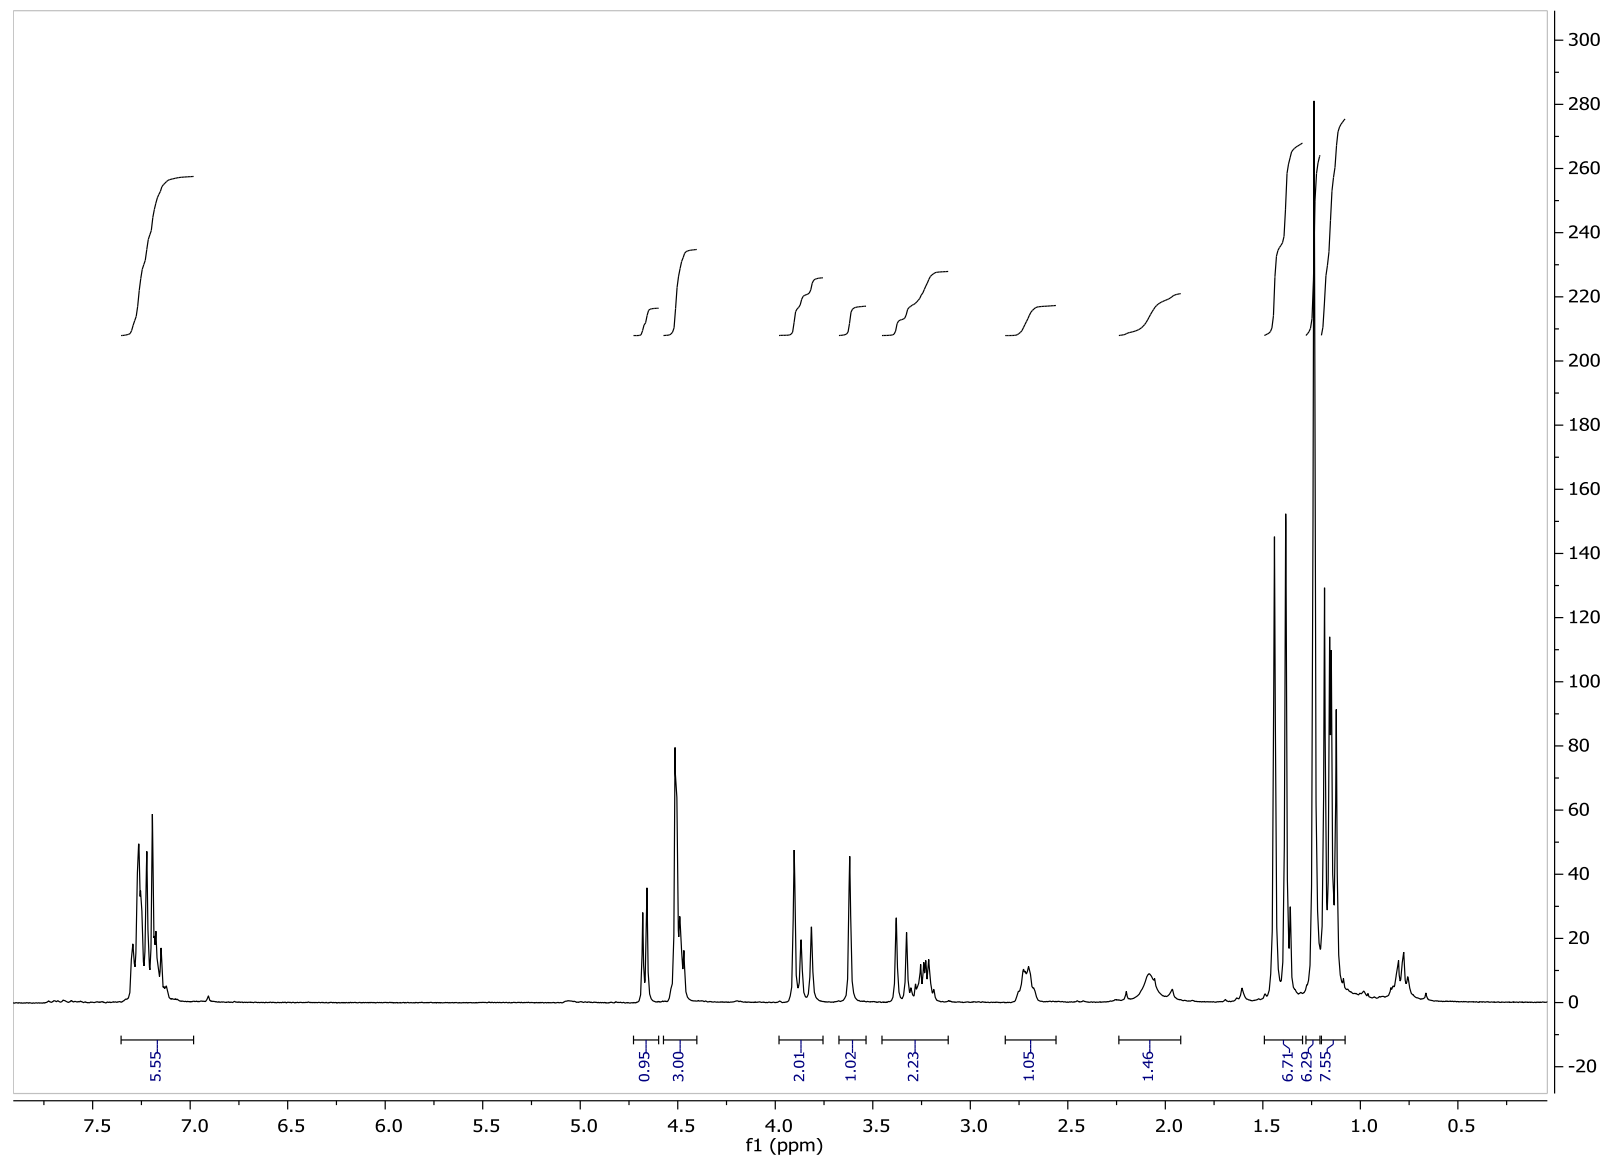



<sup>13</sup>C-NMR spectrum of compound 14 (CDCl<sub>3</sub>, 63 MHz)

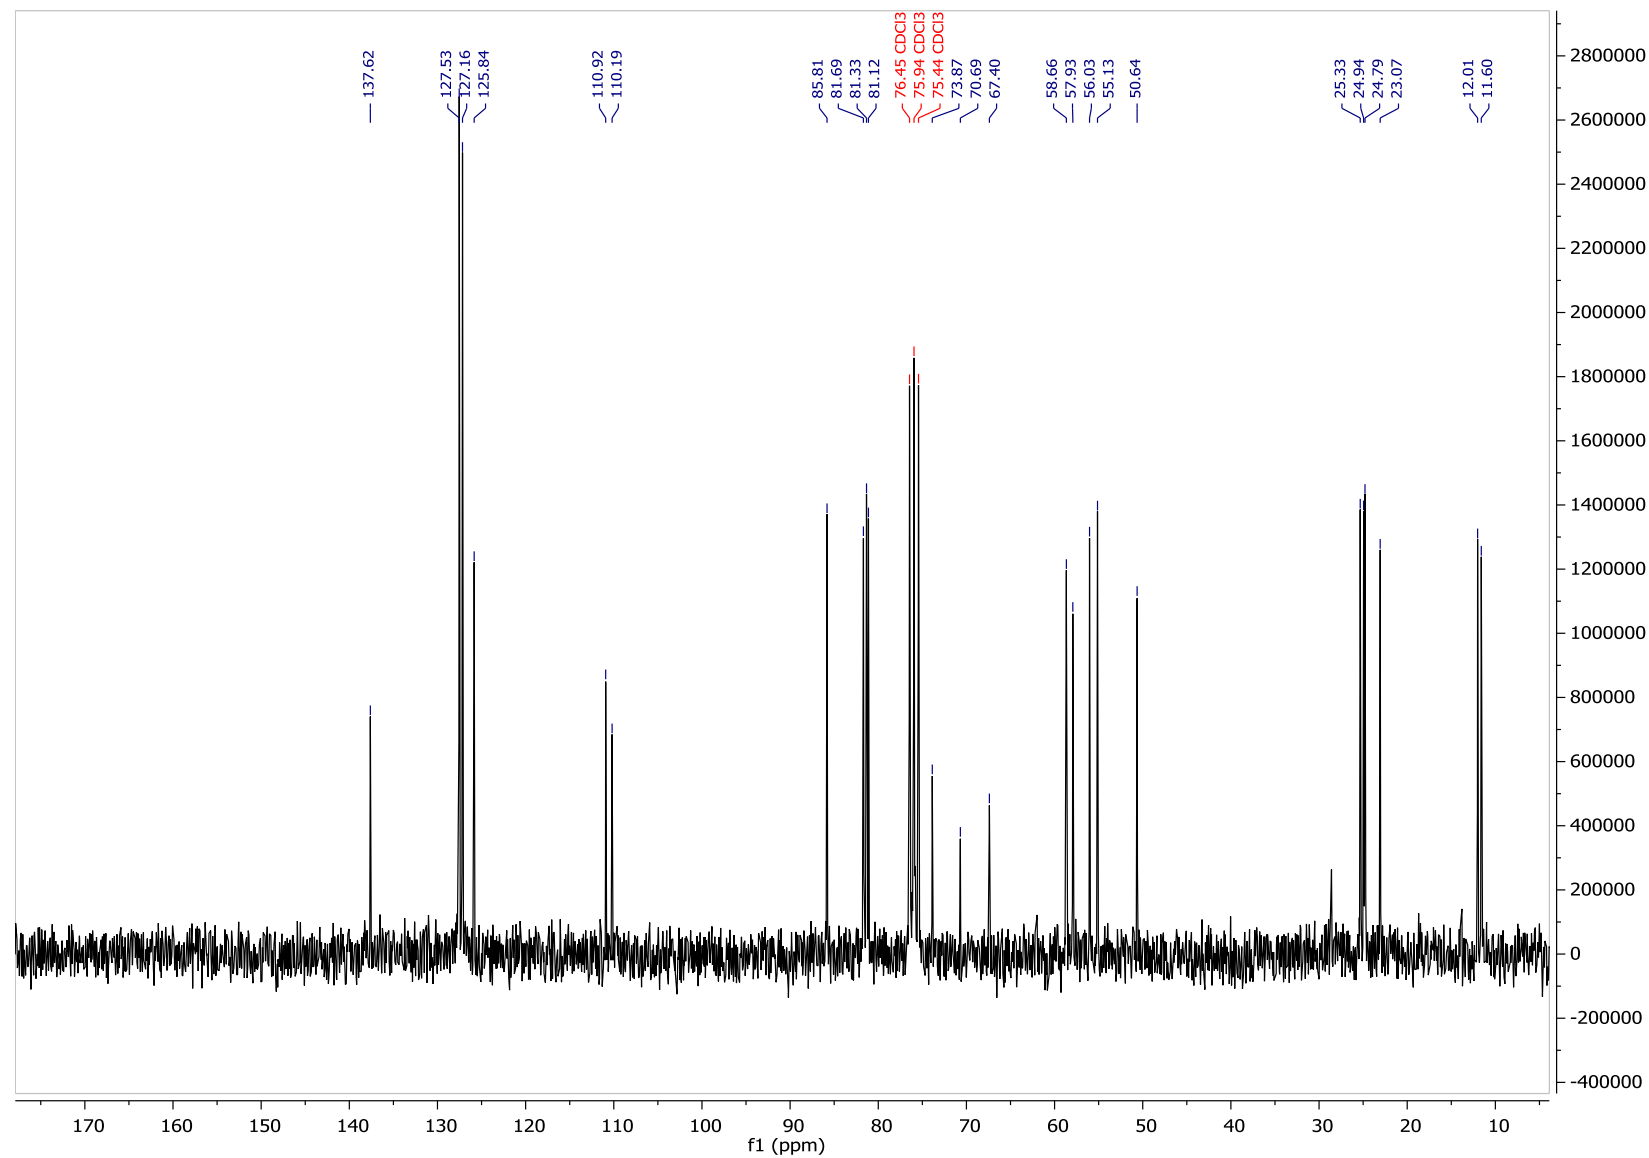

<sup>1</sup>H-NMR spectrum of compound *meso*-1 (CD<sub>3</sub>OD, 500 MHz)

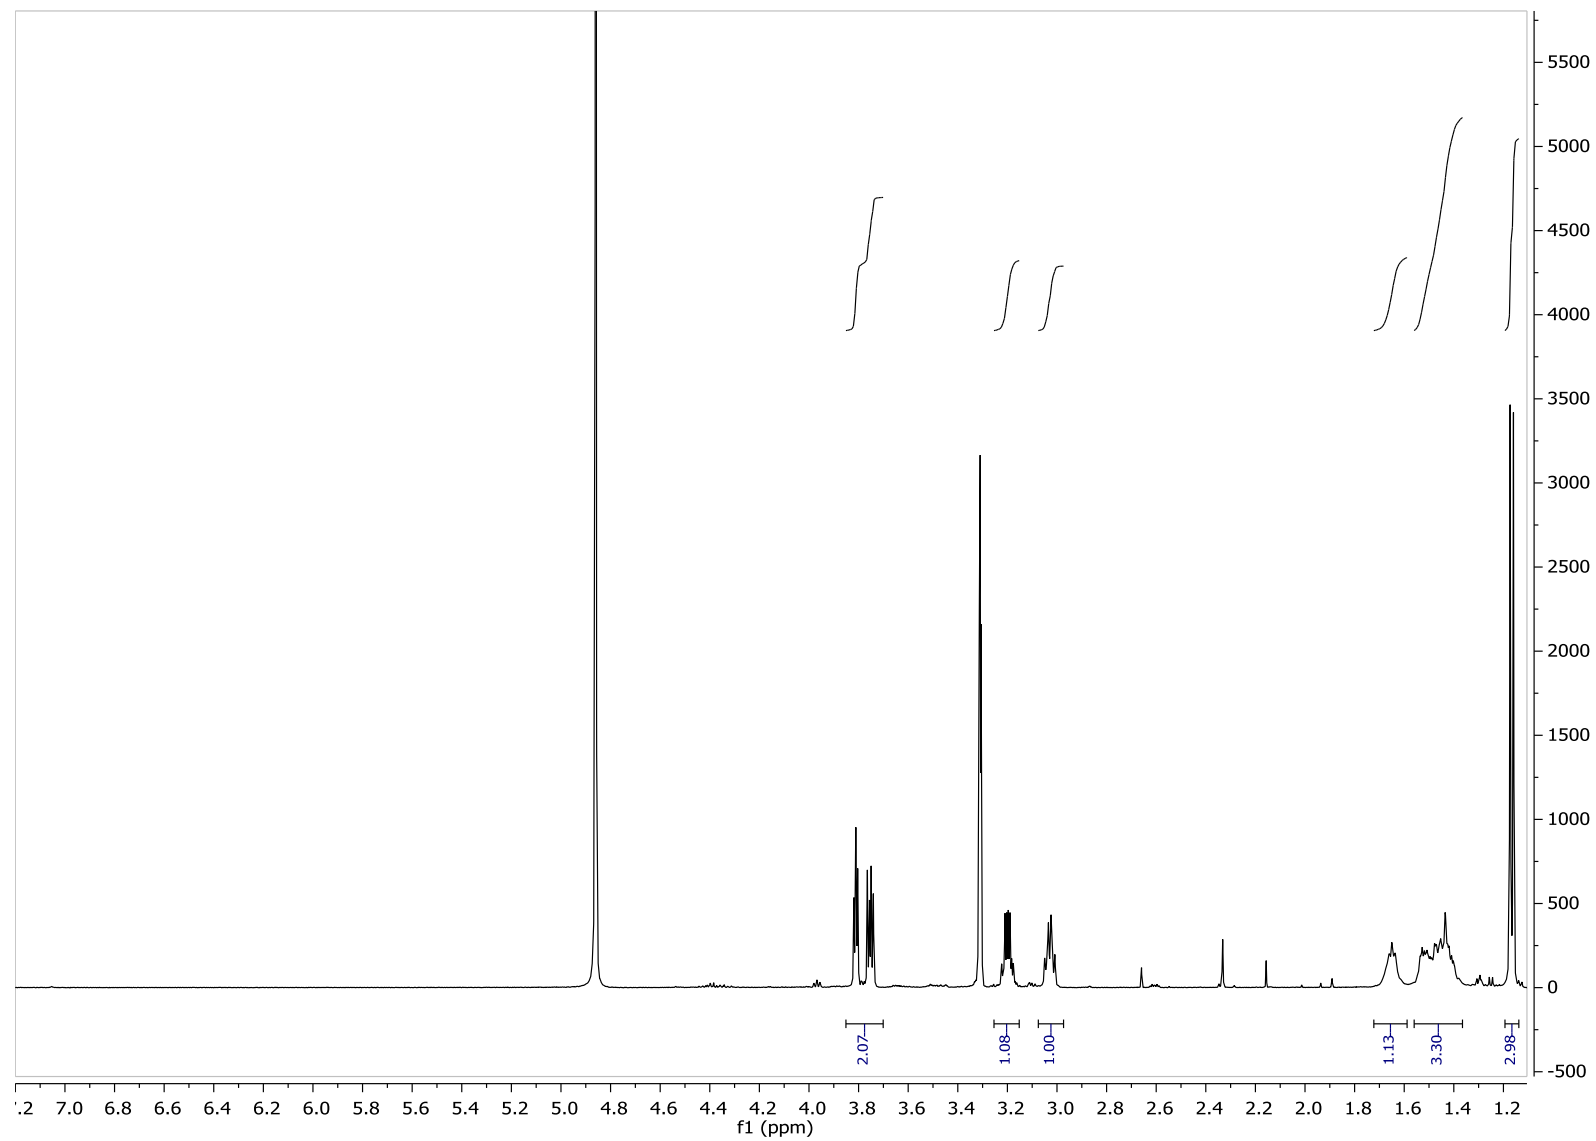

<sup>13</sup>C-NMR spectrum of compound *meso*-1 (CD<sub>3</sub>OD, 126 MHz)

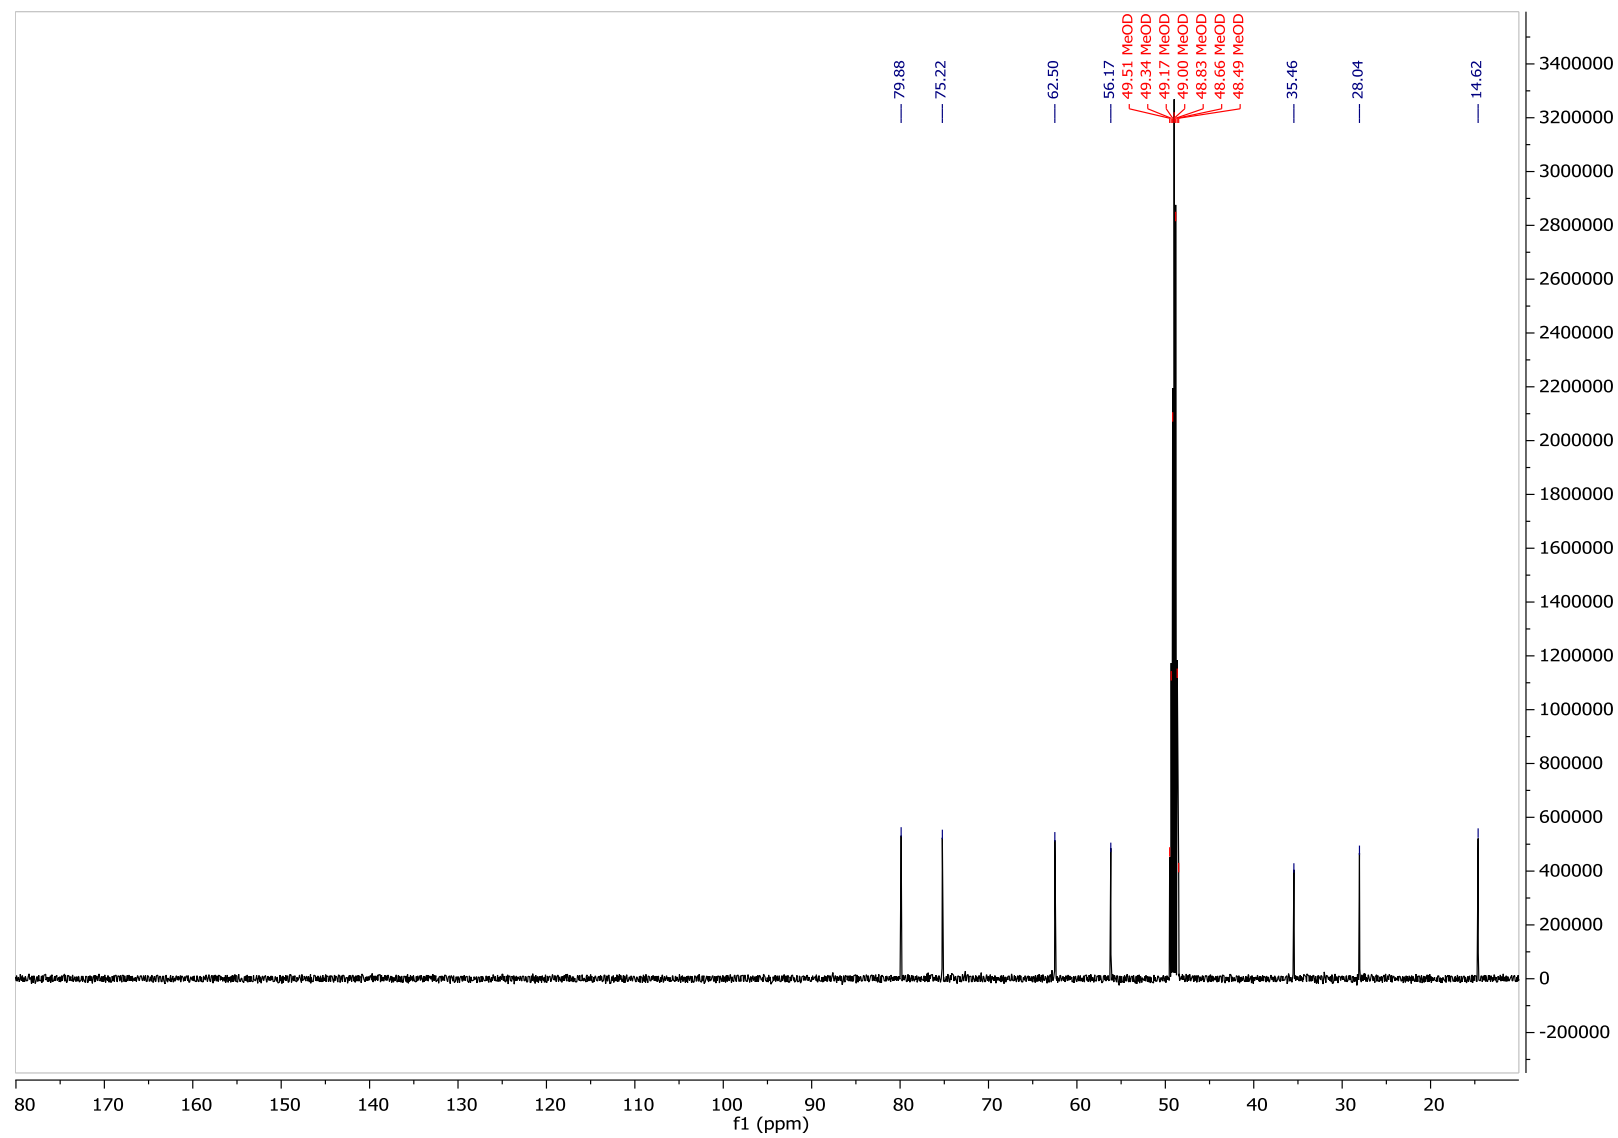

**<sup>1</sup>H-NMR spectrum of compound 4 (CD<sub>3</sub>OD, 500 MHz)**

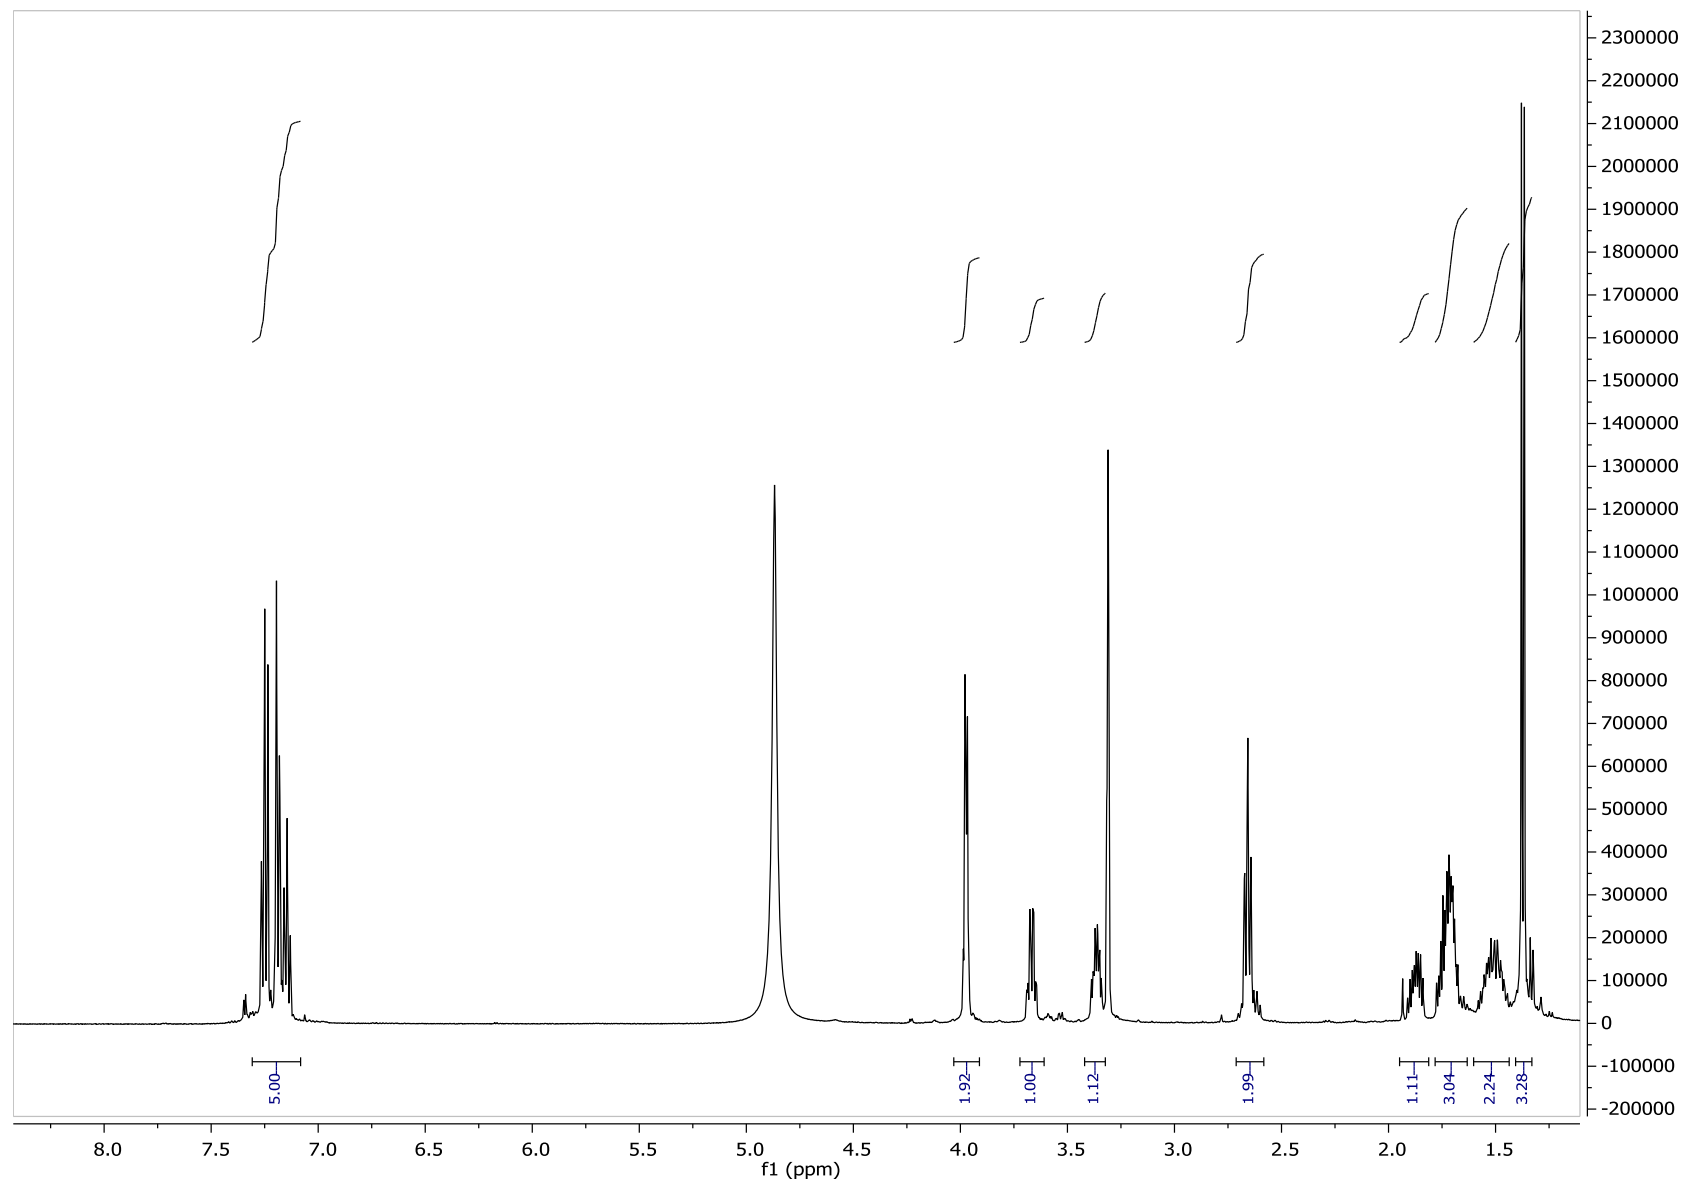

<sup>13</sup>C-NMR spectrum of compound 4 (CD<sub>3</sub>OD, 126 MHz)

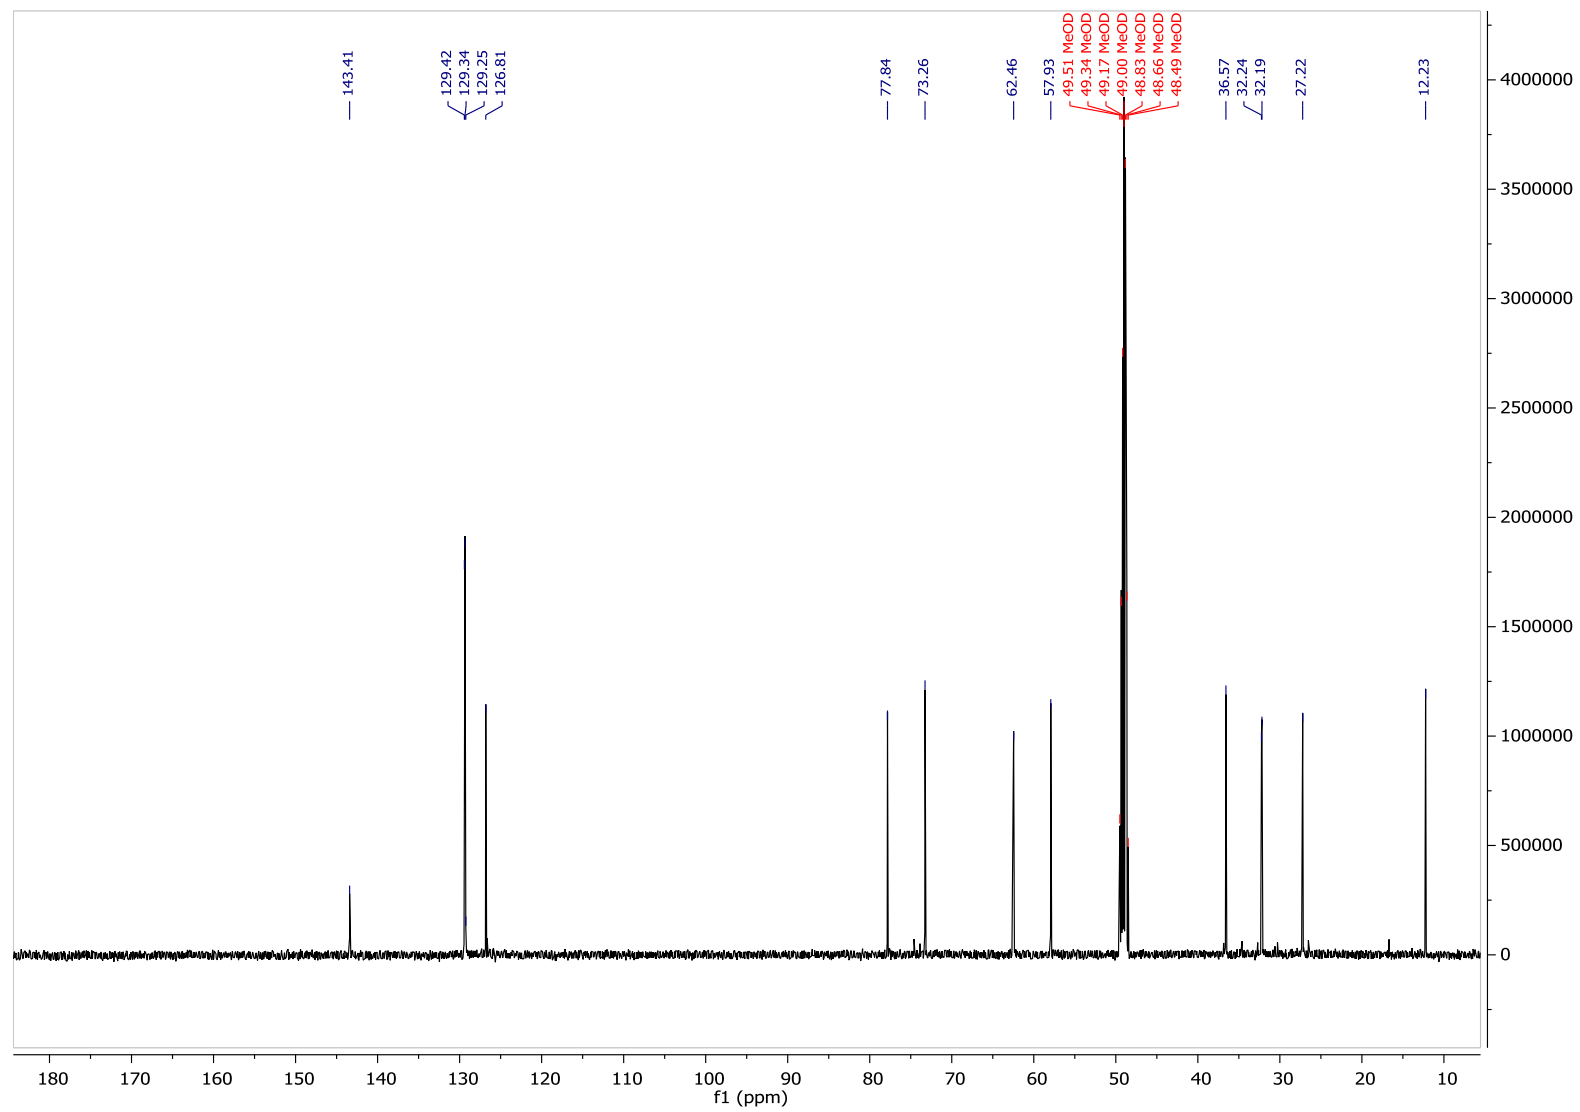

## Crystal structure determination :

| <i>BtFuc2970-1</i>                  |                       |
|-------------------------------------|-----------------------|
| <b>Data collection</b>              |                       |
| Beamline/Date                       | DLS 103<br>02.02.2014 |
| Wavelength (Å)                      | 0.97625               |
| Cell dimensions                     |                       |
| <i>a</i> , <i>b</i> , <i>c</i> (Å)  | 56.1,187.7,97.6       |
| $\alpha$ , $\beta$ , $\gamma$ (°)   | 90,94.2,90            |
| Resolution (Å)                      | 67.6-1.83             |
| $R_{\text{merge}}$                  | 0.09(0.79)            |
| $I / \sigma I$                      | 6.8(1.5)              |
| Completeness (%)                    | 99.8(99.8)            |
| Redundancy                          | 3.8(3.9)              |
| Wilson B value                      | 34.7                  |
| <b>Refinement</b>                   |                       |
| Resolution (Å)                      | 67.6-2.10             |
| No. reflections                     | 110778                |
| $R_{\text{work}} / R_{\text{free}}$ | 0.19/0.23             |
| No. atoms                           |                       |
| Protein                             | 14332                 |
| Ligand/ion                          | 140                   |
| Water                               | 773                   |
| <i>B</i> -factors                   |                       |
| Protein                             | 44.0                  |
| Ligand/ion                          | 60.7                  |
| Water                               | 42.9                  |
| R.m.s. deviations                   |                       |
| Bond lengths (Å)                    | 0.014                 |
| Bond angles (°)                     | 1.5                   |
| Ramachandran Statistics (%)         |                       |
| Preferred                           | 96.1                  |
| Allowed                             | 2.9                   |
| Outliers                            | 1                     |
| PDB codes                           | 5I5R                  |

**Table S1. MacromolecularX-ray data collection and refinement statistics.**

Lineweaver-Burk plots for all tested compounds (bovine kidney fucosidase)

Compound 1

$K_i = 0,023 \mu\text{M}$  (competitive)

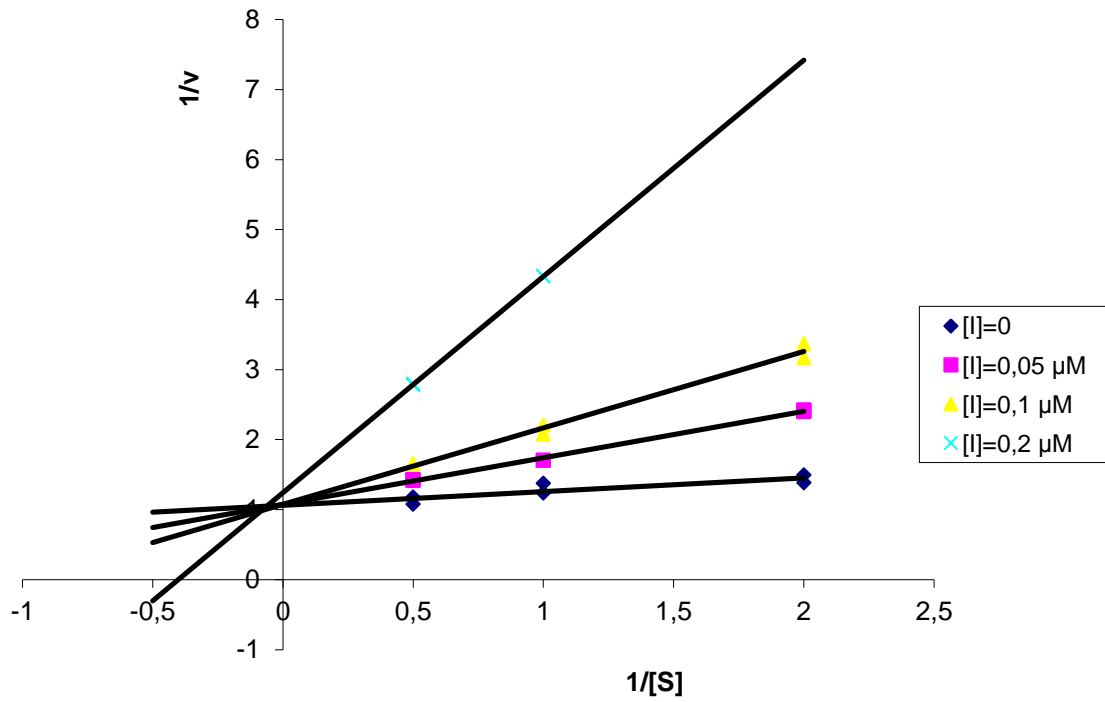

Compound *meso-1*

$K_i = 0,051 \mu\text{M}$  (mixed type of inhibition,  $K' = 0,16 \mu\text{M}$ )

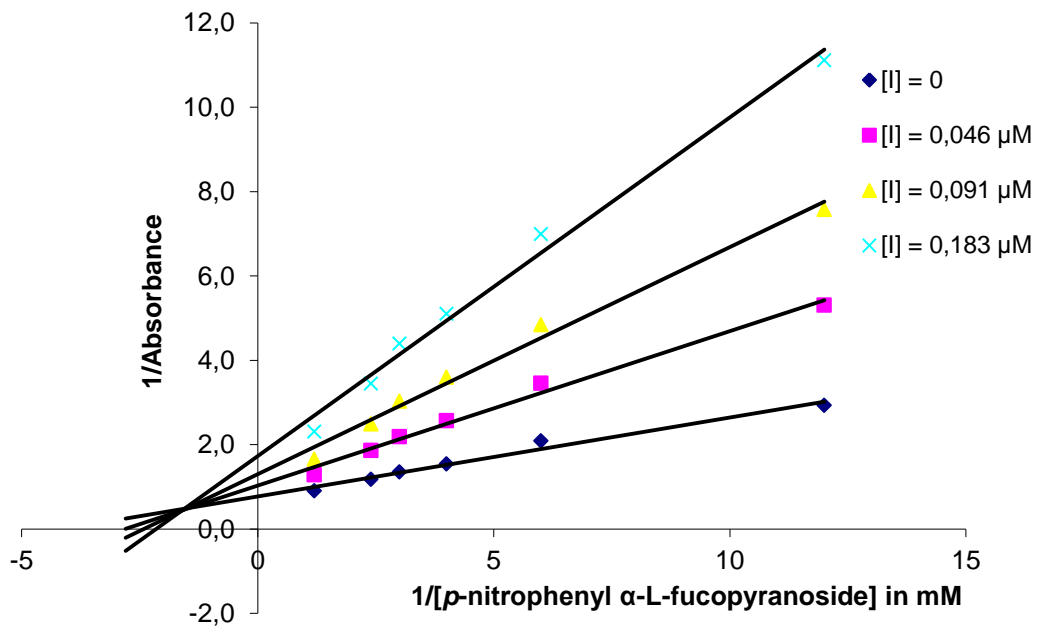

Compound *ent-1*

$K_i = 178 \mu\text{M}$  (mixed type of inhibition,  $K' = 335 \mu\text{M}$ )

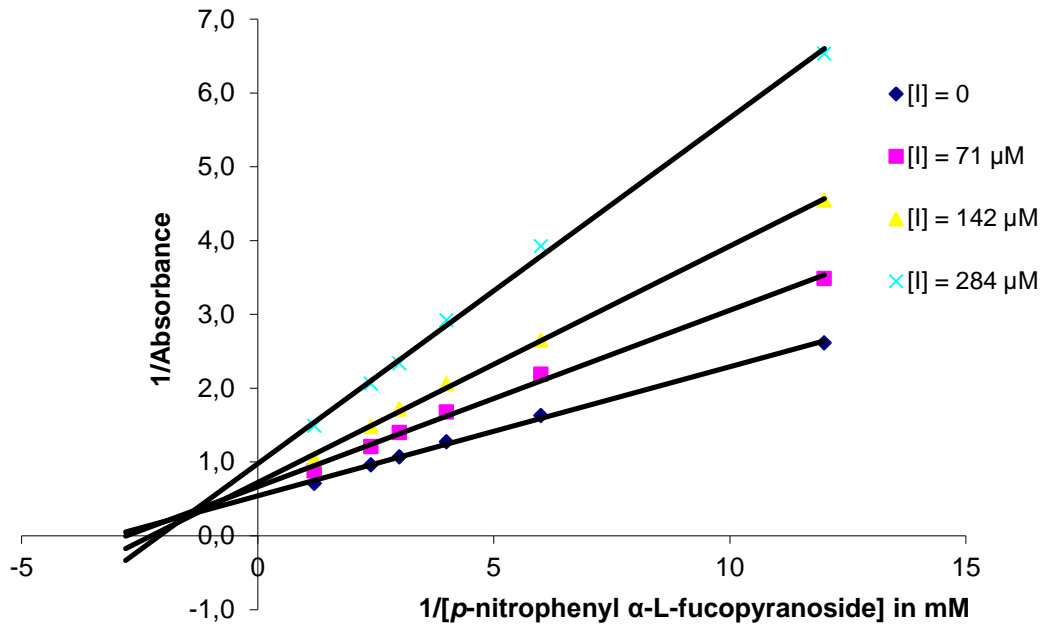

Compound 3

$K_i = 0,18 \mu\text{M}$  (mixed type of inhibition,  $K' = 1,12 \mu\text{M}$ )

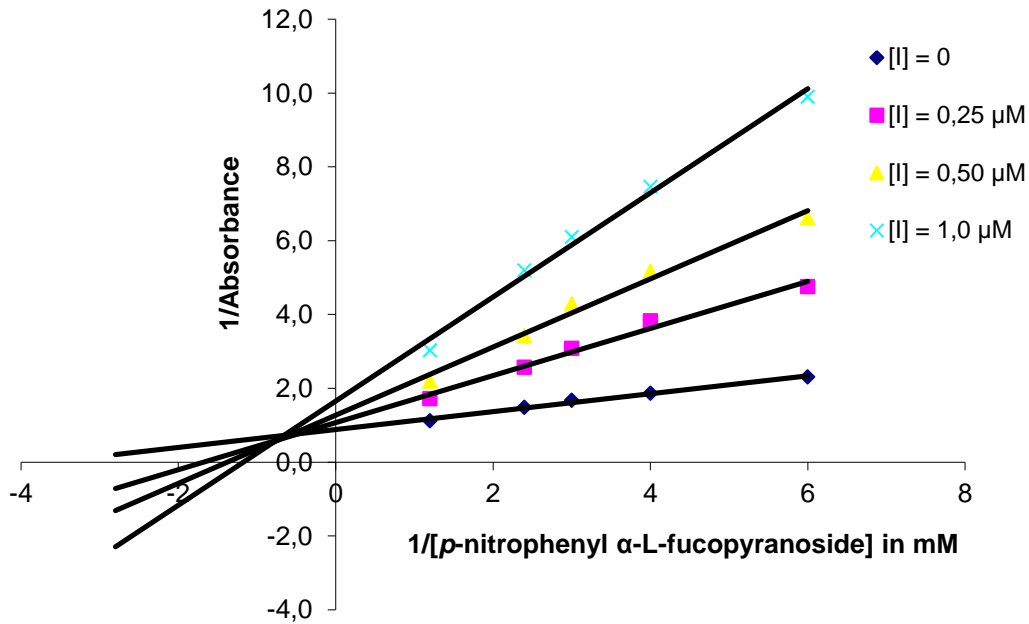



Compound *ent-3*

$K_i = 12 \mu\text{M}$  (mixed type of inhibition,  $K' = 20 \mu\text{M}$ )

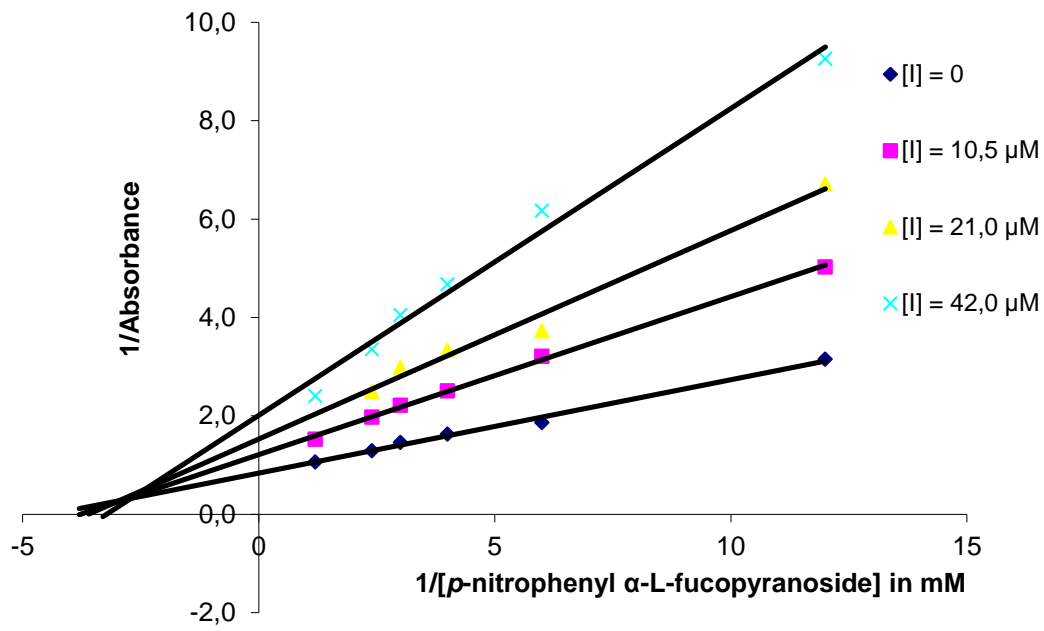

Compound 4

$K_i = 0,031 \mu\text{M}$  (mixed type of inhibition,  $K' = 0,108 \mu\text{M}$ )

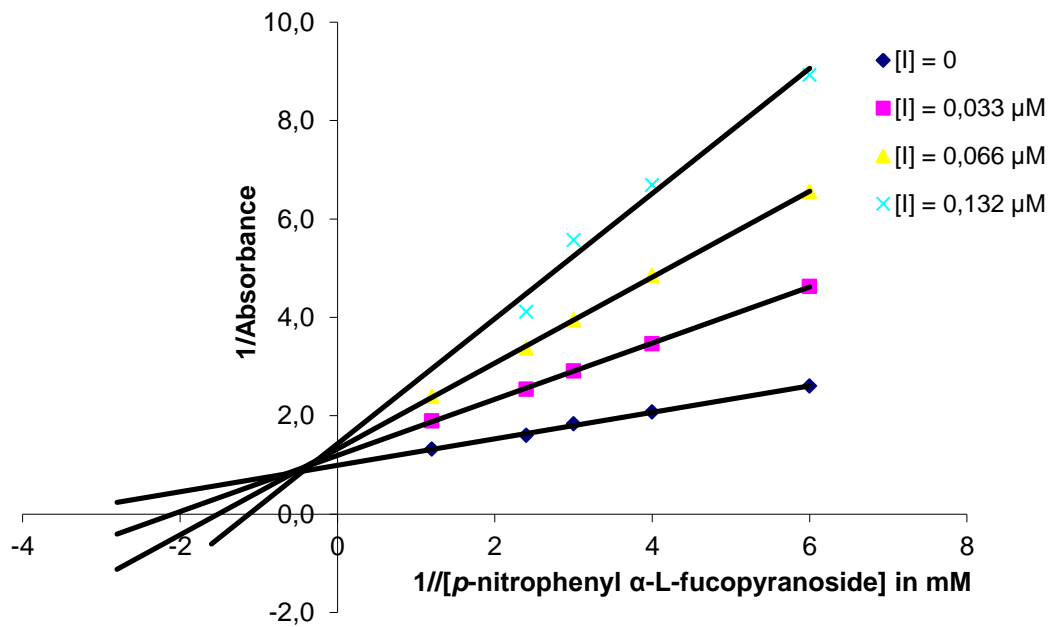

**BtFuc2970 inhibition** : Inhibition of *BtFuc2970* fucosidase by compound **1**, yielding a  $K_i$  of  $1.1\mu\text{M}$  on this bacterial system.  $V_0$  and  $V_i$  are rates in the absence and presence of inhibitor, respectively.

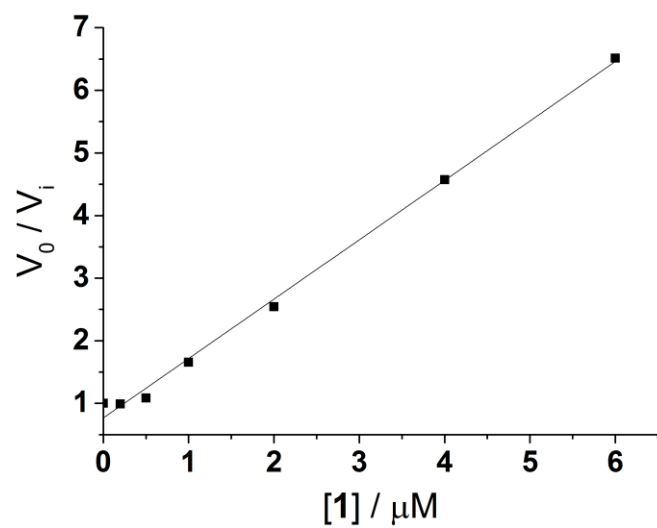

Supplement: c6ob00647g1.pdf [file c6ob00647g1.pdf]
